# Disentangling marine microbial networks across space

Ina Maria Deutschmann<sup>1\*</sup>, Erwan Delage<sup>2,3</sup>, Caterina R. Giner<sup>1</sup>, Marta Sebastián<sup>1</sup>, Julie Poulain<sup>4</sup>,  
Javier Aristegui<sup>5</sup>, Carlos M. Duarte<sup>6</sup>, Silvia G. Acinas<sup>1</sup>, Ramon Massana<sup>1</sup>, Josep M. Gasol<sup>1,7</sup>, Damien  
Eveillard<sup>2,3</sup>, Samuel Chaffron<sup>2,3</sup> and Ramiro Logares<sup>1\*</sup>

<sup>1</sup>Institute of Marine Sciences, CSIC, Passeig Marítim de la Barceloneta, 37-49, 08003, Barcelona, Spain

<sup>2</sup>Université de Nantes, CNRS UMR 6004, LS2N, F-44000, 2 rue de la Houssinière, 44322, Nantes, France

<sup>3</sup>Research Federation for the study of Global Ocean Systems Ecology and Evolution, FR2022 / Tara Oceans GOSEE, 3 rue Michel-Ange, 75016 Paris, France

<sup>4</sup>Génomique Métabolique, Genoscope, Institut François Jacob, CEA, CNRS, Univ Evry, Université Paris-Saclay, Evry, France

<sup>5</sup>Instituto de Oceanografía y Cambio Global, IOCG, Universidad de Las Palmas de Gran Canaria, ULPGC, Gran Canaria, Spain

<sup>6</sup>King Abdullah University of Science and Technology (KAUST), Red Sea Research Center (RSRC), Thuwal, Saudi Arabia

<sup>7</sup>Center for Marine Ecosystems Research, School of Sciences, Edith Cowan University, Joondalup, WA Australia

\*Corresponding authors: Ina Maria Deutschmann ([ina.m.deutschmann@gmail.com](mailto:ina.m.deutschmann@gmail.com)) and Ramiro Logares ([ramiro.logares@icm.csic.es](mailto:ramiro.logares@icm.csic.es))

Short title: Marine microbial networks across space

27 **ABSTRACT**

28 Although microbial interactions underpin ocean ecosystem functions, they remain barely known.  
29 Different studies have analyzed microbial interactions using static association networks based on  
30 omics-data. However, microbial associations are dynamic and can change across physicochemical  
31 gradients and spatial scales, which needs to be considered to understand the ocean ecosystem better.  
32 We explored associations between archaea, bacteria, and picoeukaryotes along the water column from  
33 the surface to the deep ocean across the northern subtropical to the southern temperate ocean and the  
34 Mediterranean Sea by defining sample-specific subnetworks. Quantifying spatial association  
35 recurrence, we found the lowest fraction of global associations in the bathypelagic zone, while  
36 associations endemic of certain regions increased with depth. Overall, our results highlight the need to  
37 study the dynamic nature of plankton networks and our approach represents a step forward towards a  
38 better comprehension of the biogeography of microbial interactions across ocean regions and depth  
39 layers.

## 40 INTRODUCTION

41 Microorganisms play fundamental roles in ecosystem functioning (DeLong, 2009; Krabberød *et al.*,  
42 2017) and ocean biogeochemical cycling (Falkowski *et al.*, 2008). The main processes shaping  
43 microbial community composition are selection, dispersal, and drift (Vellend, 2020). Selection exerted  
44 via environmental conditions and biotic interactions are essential in structuring the ocean microbiome  
45 (Logares *et al.*, 2020), leading to heterogeneities reflecting those in the ocean environment, mainly in  
46 terms of temperature, light, pressure, nutrients and salinity. In particular, global-scale studies of the  
47 surface ocean reported strong associations between microbial community composition and diversity  
48 with temperature (Sunagawa *et al.*, 2015; Ibarbalz *et al.*, 2019; Salazar *et al.*, 2019; Logares *et al.*,  
49 2020). Marked changes in microbial communities with ocean depth have also been reported (Cram *et al.*,  
50 2015; Parada & Fuhrman, 2017; Mestre *et al.*, 2018; Peoples *et al.*, 2018; Xu *et al.*, 2018; Giner *et al.*,  
51 2020), reflecting the steep vertical gradients in light, temperature, nutrients and pressure.

52 Prokaryotes (bacteria and archaea) and unicellular eukaryotes are fundamentally different in  
53 terms of ecological roles, functional versatility, and evolutionary history (Massana & Logares, 2013)  
54 and are connected through biogeochemical and food web interaction networks (Layeghifard *et al.*,  
55 2017; Seymour *et al.*, 2017). Still, knowledge about these interactions remains limited despite their  
56 importance to understand better microbial life in the oceans (Krabberød *et al.*, 2017; Bjorbækmo *et al.*,  
57 2019). Such interactions are very difficult to resolve experimentally, mainly because most  
58 microorganisms are hard to cultivate (Baldauf, 2008; Lewis *et al.*, 2020) and synthetic laboratory  
59 communities are unlikely to mirror the complexity of wild communities. However, metabarcoding  
60 approaches to identify and quantify marine microbial taxa allow to infer association networks, where  
61 nodes represent microorganisms and edges potential interactions.

62 Association networks provide a general overview of the microbial ecosystem aggregated over  
63 a given period of time (Steele *et al.*, 2011; Chow *et al.*, 2013, 2014; Cram *et al.*, 2015; Needham *et al.*,  
64 2017; Parada & Fuhrman, 2017) or through space (Lima-Mendez *et al.*, 2015; Milici *et al.*, 2016;

65 Chaffron *et al.*, 2020). Previous work characterized potential marine microbial interactions, including  
66 associations within and across depths. For example, monthly sampling allowed investigating  
67 prokaryotic associations in the San Pedro Channel, off the coast of Los Angeles, California, covering  
68 the water column from the surface (5 m) to the seafloor (890 m) (Cram *et al.*, 2015; Parada & Fuhrman,  
69 2017). Furthermore, a global spatial survey occurring within the TARA Oceans expedition, allowed  
70 to investigate planktonic associations between a range of organismal size fractions in the epipelagic  
71 zone, from pole to pole (Lima-Mendez *et al.*, 2015; Chaffron *et al.*, 2020). However, these studies did  
72 not include the bathypelagic realm, below 1000 m depth, which represents the largest microbial habitat  
73 in the biosphere (Arístegui *et al.*, 2009).

74 A single static network determined from spatially distributed samples over the global ocean  
75 captures global, regional and local associations. Also, given that global-ocean expeditions collect  
76 samples over several months, networks could include temporal associations, yet disentangling them  
77 from spatial associations is normally complicated and not considered. Global associations may  
78 constitute the core interactome, that is, the set of microbial interactions essential for the functioning  
79 of the ocean ecosystem (Shade & Handelsman, 2012). Core associations may be detected by  
80 constructing a single network from numerous locations and identifying the most significant  
81 associations and strongest associations (Coutinho *et al.*, 2015). On the other hand, regional and local  
82 associations may point to interactions occurring in specific spatial areas of different sizes due to  
83 particular taxa distributions resulting from environmental selection, dispersal limitation, specific  
84 ecological niches or biotic/abiotic filtering. The fraction of regional associations may be determined  
85 by excluding all samples belonging to one region and recomputing network inference with the reduced  
86 dataset (Lima-Mendez *et al.*, 2015). Alternatively, regional networks can be built allowing to  
87 determine both, global and regional associations (Mandakovic *et al.*, 2018) by investigating which  
88 edges networks have in common and which are unique. Such regional networks could contribute to  
89 understanding how the architecture of potential microbial interactions changes with environmental

90 heterogeneity, also helping to comprehend associations that are stable (i.e., two partners always  
91 together) or variable (one partner able to interact with multiple partners across locations).

92 Regional networks, however, require a high number of samples per delineated zone, but these  
93 may not be available due to logistic or budgetary limitations. Recent approaches circumvent this  
94 limitation by deriving sample-specific subnetworks from a single static, i.e., all-sample network, which  
95 allows quantifying association recurrence over spatiotemporal scales (Chaffron *et al.*, 2020;  
96 Deutschmann *et al.*, 2021). Here, we adjusted this approach and used it to determine global and  
97 regional associations along vertical and horizontal ocean scales, which allowed us determining the  
98 biogeography of marine microbial associations. We analyzed associations between archaea, bacteria,  
99 and picoeukaryotes covering the water column, from surface to deep waters, in the Mediterranean Sea  
100 (hereafter MS) and five ocean basins: North and South Atlantic Ocean, North and South Pacific Ocean,  
101 and Indian Ocean (hereafter NAO, SAO, NPO, SPO, and IO). We estimated microbial taxa abundances  
102 using 397 globally distributed samples from the epipelagic to the bathypelagic zone in six ocean  
103 regions (Figure 1). We separated most epipelagic samples into surface and deep-chlorophyll maximum  
104 (DCM) samples. Next, we constructed a first global network comprising 5457 nodes and 31966 edges,  
105 30657 (95.9%) positive and 1309 (4.1%) negative. Then, we applied a filter strategy including the  
106 removal of environmentally-driven edges due to nutrients (4.9%  $\text{NO}_3^-$ , 4.2%  $\text{PO}_4^{3-}$ , 2.0%  $\text{SiO}_2$ ),  
107 temperature (1.9%), salinity (0.2%), and Fluorescence (0.01%) (Supplementary Table 1). Altogether,  
108 our sample-specific network-based exploration allowed us to determine core associations in the global  
109 ocean and specific regions, analyze changes in associations and network topology with depth and  
110 regions, and to investigate the vertical connectivity of planktonic associations.

111

## 112 **RESULTS**

113 *From a global static network to sample-specific subnetworks*

114 The resulting global static network contained 5448 nodes and 29118 edges, 28178 (96.8%) positive  
115 and 940 (3.2%) negative. It served as the underlying structure from which we generated 397 sample-  
116 specific subnetworks following three criteria. First, we required that an edge must be present in the  
117 global static network. Second, an edge can only be present within a subnetwork if both microorganisms  
118 associated with the edge have a sequence abundance above zero in the corresponding sample. Third,  
119 microorganisms associated need to appear together (intersection) in more than 20% of the samples, in  
120 which one or both appear (union) for that specific region and depth. This third condition was robust  
121 since random subsets retained most associations compared with the associations obtained when using  
122 all samples (Supplementary Figure 1). In addition to these three conditions, a node is present in a  
123 subnetwork if it has at least one association partner. Consequently, each subnetwork is included in the  
124 global static network.

125

### 126 *Spatial recurrence*

127 We determined the spatial recurrence of each association using its prevalence computed as the fraction  
128 of subnetworks in which a given association was present across the 397 samples (Figure 2A) and  
129 within each region-depth-layer combination (Figure 2B). The global ocean surface layer (contributing  
130 with 40% of samples) had more associations compared to the other depths (Figure 2B). Remarkably,  
131 14971 of 18234 (82.1%) global ocean surface associations were absent from the MS. In turn, the  
132 number of surface associations was similar across ocean basins (Figure 2B).

133         Considering the most prevalent associations (those found in over 70% of subnetworks), we  
134 found that major vertical taxonomic patterns were conserved across regions: the epipelagic layers  
135 (surface and DCM) and the two lower layers (meso- and bathypelagic zones) were more similar to  
136 each other, respectively (Figure 3). The fraction of associations including *Alphaproteobacteria* was  
137 moderate to high in all zones in contrast to *Cyanobacteria* appearing mainly, as expected, in the  
138 epipelagic zone (Figure 3). The fraction of *Dinoflagellata* associations was moderate to high in the

139 epipelagic zone and lower in the meso- and bathypelagic zones. While *Dinoflagellata* associations  
140 dominated most epipelagic layers, fewer were found in the MS and SAO surface and NAO DCM  
141 (Figure 3). *Thaumarchaeota* associations were moderate to high especially in the mesopelagic  
142 (dominant in the MS), moderate in the bathypelagic, and lower in the epipelagic zone (Figure 3).  
143 Another interesting pattern is the increase in associations including *Gammaproteobacteria* with depth  
144 being higher in the meso- and bathypelagic than in the epipelagic, especially in the SAO, SPO, NPO  
145 and IO.

146        Highly prevalent associations present across all regions are candidates to represent putative  
147 core interactions in the global ocean, which are likely to perform processes crucial for ecosystem  
148 functioning. We defined global associations as those appearing in more than 70% of subnetworks in  
149 each region. While we found several (21-26) global associations in the epi- and mesopelagic zones, no  
150 global associations were identified in the bathypelagic zone (Table 1, Supplementary Figure 2). In  
151 addition, we resolved prevalent (>50%) and low-frequency (>20%) associations. These three types of  
152 associations are distinct by definition, i.e., a global association cannot be assigned to another type. The  
153 fraction of global, prevalent, and low-frequency associations was highest in the DCM layer and lowest  
154 in the bathypelagic zone (third and fifth column in Table 1, Supplementary Figure 2B, 2D). Given that  
155 the MS bathypelagic is warmer (median temperature of 13.78°C) than the global ocean bathypelagic  
156 (median temperature between 1.4°C in SPO and 4.41°C in NAO), we calculated these associations for  
157 the global ocean only. We found slightly to moderately more global, prevalent, and low-frequency  
158 associations in the global ocean when not considering the MS (fifth to seventh row in Table 1,  
159 Supplementary Figure 2E-H).

160        Next, we determined regional associations within each depth layer. A regional association was  
161 defined as detected in at least one sample-specific subnetwork of one region and absent from all  
162 subnetworks of the other five regions. Results indicated an increasing proportion of regional  
163 associations with depth (Table 1, Figure 4A-B, Supplementary Figure 3). We found substantially more

164 associations in the DCM and mesopelagic layers of the MS than corresponding layers of the global  
165 ocean. This may reflect the different characteristics of these layers in the MS vs. the global ocean or  
166 the massive differences in spatial dimensions between the global ocean and the MS. More surface and  
167 bathypelagic regional associations corresponded to the MS and NAO than in other regions (Table 1).  
168 Most regional associations had low prevalence, i.e., they were present in a few sample-specific  
169 subnetworks within the region (Figure 4C). We found 235 prokaryotic highly prevalent (>70%)  
170 regional associations in contrast to 89 eukaryotic and 24 associations between domains  
171 (Supplementary Material 1).

172 Previous studies have found a substantial vertical connectivity in the ocean microbiota, with  
173 surface microorganisms having an impact in deep sea counterparts (Mestre *et al.*, 2018; Ruiz-González  
174 *et al.*, 2020). Thus, here, we analyzed the vertical connectivity of microbial associations. Few  
175 associations appeared throughout the water column within a region: 327 prokaryotic, 119 eukaryotic,  
176 and 13 associations between domains (Supplementary Material 2). In general, most associations  
177 appearing in the meso- and bathypelagic did not appear in upper layers except for the MS and NAO  
178 where most and about half, respectively, of the bathypelagic associations already appeared in the  
179 mesopelagic (Figure 5). Specifically, 81.77 – 90.90% mesopelagic and 43.54-72.71% bathypelagic  
180 associations appeared for the first time in the five ocean basins (Supplementary Table 2). In the MS,  
181 71.24% mesopelagic and 22.44% bathypelagic associations appeared for the first time and 69.71% of  
182 bathypelagic associations already appeared in the mesopelagic (Supplementary Table 2). This points  
183 to specific microbial interactions occurring in the deep ocean that do not occur in upper layers. In  
184 addition, while most surface associations also appeared in the DCM in the MS, most surface  
185 associations disappeared with depth in the five ocean basins (Figure 5) suggesting that most surface  
186 ocean associations are not transferred to the deep sea, despite microbial sinking (Mestre *et al.*, 2018).  
187 In fact, we observed that most deep ocean ASVs already appeared in the upper layers (Supplementary  
188 Figure 4), in agreement with previous work that has shown that a large proportion of deep sea microbial



189 taxa are also found in surface waters, and that their presence in the deep sea is related to sinking  
190 processes (Mestre *et al.*, 2018).

191

### 192 *Comparing subnetworks*

193 Vertical and horizontal spatial variability is expected to affect network topology via biotic and abiotic  
194 variables as well as through dispersal processes (e.g., dispersal limitation). Yet, we have a limited  
195 understanding on how much marine microbial networks change due to these processes, thus analyzing  
196 the topology of subnetworks from specific ocean regions and depths is a first step to address this  
197 question. We compared the subnetworks of the six regions and depth layers using eight global network  
198 metrics (see Methods). We found that global network metrics change along the water column  
199 (Supplementary Figure 5). As a general trend, subnetworks from deeper zones were more clustered  
200 (transitivity) with higher average path length, stronger associations (average positive association  
201 scores) and lower assortativity (based on degree) compared to those in surface waters. Most DCM and  
202 bathypelagic subnetworks had the highest connectivity (edge density). Contrarily, in the MS, the  
203 surface subnetworks had the highest connectivity (Supplementary Figure 5).

204 To avoid predefined groupings into regions and depth layers, we grouped similar subnetworks  
205 via a local network metric (see Methods) and identified 36 clusters of 5 to 28 subnetworks  
206 (Supplementary Table 3). We found 13 (36.1%) clusters that were dominated by surface subnetworks:  
207 six clusters (100% surface subnetworks) from three to five oceans but not MS and seven clusters with  
208 55-86% surface networks from two to five of the six ocean regions. In turn, 11 clusters were dominated  
209 by a deeper layer: two DCM (64-90%), five mesopelagic (62-83%) and four bathypelagic dominated  
210 clusters (60-69%). Nine of these 11 clusters combined different regions except for one mesopelagic  
211 and one bathypelagic dominated cluster representing exclusively the MS (Supplementary Table 3).  
212 Furthermore, we found 11 clusters containing exclusively or mainly MS subnetworks in contrast to  
213 only one cluster dominated by an ocean basin (NAO).

214 Next, we built a more comprehensive representation of network similarities between  
215 subnetworks via a minimal spanning tree (MST, see Methods) to underline the pervasive connectivity  
216 of associations across depth and environmental gradients. The depth layers, ocean regions, location of  
217 clusters, and environmental factors were projected onto the MST (Figure 6). Most surface subnetworks  
218 were centrally located, while subnetworks from other depths appeared in different MST areas. Most  
219 MS subnetworks were located in a specific branch of the MST, while the five oceans were mixed,  
220 indicating homogeneity within oceans but network-based differences between the oceans and the MS.  
221 However, subnetworks in the MST tended to connect to subnetworks from the same depth layer, cluster  
222 or similar environmental conditions. All in all, the above results suggest a strong influence of  
223 environmental gradients in shaping network topology and plankton associations, as previously  
224 observed in epipelagic communities at global scale (Chaffron *et al.*, 2020).

225

## 226 **DISCUSSION**

227 In this work, we disentangled and analyzed global and regional microbial associations across the  
228 oceans' vertical and horizontal dimensions. We found a low number of global associations indicating  
229 a potentially small global core interactome within each depth layer across six oceanic regions. Core  
230 microorganisms are often defined as those appearing in most or all samples from similar habitats  
231 (Shade & Handelsman, 2012). We previously identified a core microbiota in a coastal MS observatory  
232 based on both association patterns (Krabberød *et al.*, 2021) and temporal recurrence of associations  
233 (Deutschmann *et al.*, 2021). Both studies indicate more robust microbial connectivity, suggesting a  
234 broader core, in colder than in warmer seasons. In contrast, within each region, we found less highly  
235 prevalent associations in the bathypelagic zone of the global ocean (pointing to a smaller regional core)  
236 than in the upper layers, except from the NPO, having less highly prevalent associations in the meso-  
237 than in the bathypelagic. In agreement, we found more regional bathypelagic associations than in upper  
238 layers. Thus, associations may reflect the heterogeneity and isolation of the deep ocean regions due to

239 deep currents, water masses, or the topography of the seafloor that may prevent microbial dispersal.  
240 Moreover, the higher complexity of the deep ocean ecosystem may provide a higher number of  
241 ecological niches potentially resulting in more regional associations and agreeing with our  
242 observations. A high diversification of niches may be associated to the different quality and types  
243 (labile, recalcitrant, etc.) of organic matter reaching the deep ocean from the epipelagic zone (Aristegui  
244 *et al.*, 2009), which is significantly different across oceanic regions (Hansell & Carlson, 1998). In an  
245 exploration of generalists versus specialist prokaryotic metagenome-assembled genomes (MAGs) in  
246 the arctic Ocean, most of the specialists were linked to mesopelagic samples indicating that their  
247 distribution was uneven across depth layers (Royo-Llonch *et al.*, 2020). This is in agreement with  
248 putatively more niches in the deep ocean than in upper ocean layers leading to more specialist taxa and  
249 subsequently more regional associations.

250 Vertical connectivity in the ocean microbiome is partially modulated by surface productivity  
251 through sinking particles (Mestre *et al.*, 2018; Boeuf *et al.*, 2019; Ruiz-González *et al.*, 2020). An  
252 analysis of eight stations, distributed across the Atlantic, Pacific and Indian oceans (including 4 depths:  
253 Surface, DCM, meso- and bathypelagic), indicated that bathypelagic communities comprise both  
254 endemic taxa as well as surface-related taxa arriving via sinking particles (Mestre *et al.*, 2018). Ruiz-  
255 González *et al.* (Ruiz-González *et al.*, 2020) identified for both components (i.e. surface-related and  
256 deep-endemic) the dominating phylogenetic groups: while *Thaumarchaeota*, *Deltaproteobacteria*,  
257 *OM190* (*Planctomycetes*) and *Planctomycetacia* (*Planctomycetes*) dominated the endemic  
258 bathypelagic communities, *Actinobacteria*, *Alphaproteobacteria*, *Gammaproteobacteria* and  
259 *Flavobacteriia* (*Bacteroidetes*) dominated the surface-related taxa in the bathypelagic zone. We found  
260 association partners for each dominating phylogenetic group within each investigated type of  
261 association, i.e., highly prevalent, regional, global, prevalent, and low-frequency associations. While  
262 ASVs belonging to these taxonomic groups were present throughout the water column, specific  
263 associations were observed especially in the mesopelagic and bathypelagic zones, which suggests

264 specific associations between deep-sea endemic taxa. This is in agreement with a recent study that  
265 found a remarkable taxonomic novelty in the deep ocean after analyzing 58 microbial metagenomes  
266 from global samples, unveiling ~68% archaeal and ~58% bacterial novel species (Acinas *et al.*, 2021).

267 Less is known about associations found along the entire or a substantial fraction of the water  
268 column, suggesting consortia of associated microorganisms that sink together or that populate large  
269 vertical ranges of the water column. Associations present across all layers were few but may represent  
270 interacting taxa that populate the entire water column or that sink together. However, given that we  
271 targeted mainly picoplankton, we would not expect a considerable influence of sinking particles in the  
272 vertical distribution of associations in this study. Some associations observed in the deep ocean may  
273 correspond to consortia of taxa degrading sinking particles, or taxa that might have detached from  
274 sinking particles, i.e., dual life-style taxa as observed in (Sebastián, Sánchez, *et al.*, 2021).  
275 Alternatively, microorganisms may have reached bathypelagic waters via fast-sinking processes,  
276 embedded in (larger) particles (Agusti *et al.*, 2015). By following this observation, a previous study  
277 found that the abundances of microorganisms in deeper layers mirrored the changes in abundance of  
278 microorganisms in shallower layers, at a single sampling station, indicating that communities  
279 populating different ocean depths are not isolated from each other but linked, possibly through sinking  
280 particles or migrating organisms transporting nutrients through the water column (Cram *et al.*, 2015).  
281 However, microbial co-occurrence alone does not suffice to infer microbial interactions, because  
282 different mechanisms, such as selection or dispersal, influence species as well as their interactions  
283 (Poisot *et al.*, 2012). Our results suggest that microorganisms can potentially change their interaction  
284 partners along vertical (and horizontal) scales and, to a lesser extent, maintain interactions along the  
285 water column.

286 A study of global-ocean picoplanktonic eukaryotes through the water column (from the Epi- to  
287 the Bathypelagic zone) found the highest and lowest relative metabolic activity for most eukaryotes in  
288 the meso- and bathypelagic zones, respectively (Giner *et al.*, 2020). Thus, we could hypothesize more

289 competition in the mesopelagic zone and more beneficial interactions in the bathypelagic zone. In our  
290 study, mesopelagic subnetworks displayed the lowest connectivity in most regions on average, and we  
291 found the strongest associations among both meso- and bathypelagic subnetworks. Moreover, we  
292 found the highest clustering (transitivity) in the meso- and bathypelagic zones (relatively colder  
293 waters) compared to the epipelagic zone (warmer waters). Similarly, a previous global-scale study  
294 (Chaffron *et al.*, 2020) concentrating on the epipelagic zone and including polar waters, found higher  
295 edge density, association strength and clustering in polar (colder waters) compared to warmer waters.  
296 These results suggest that either microorganisms interact more in colder and darker environments or  
297 that their recurrence is higher due to a higher environmental selection exerted by low temperatures and  
298 no light. Alternatively, limited resources (primarily nutrients) in the surface versus deep ocean may  
299 prevent the establishment of specific microbial interactions. Furthermore, another explanation could  
300 be the higher diversity of ecological niches and, thus, a higher diversity of associations in the meso-  
301 and bathypelagic.

302 Through quantifying regional associations, our results indicated distinct associations in the MS,  
303 where most regional associations were observed compared to the global ocean, as previously shown  
304 in an epipelagic network (Lima-Mendez *et al.*, 2015). Furthermore, we found a substantial number of  
305 regional associations in the NAO compared to other ocean basins, contrasting with the NAO having  
306 the lowest number of regional associations in a previous epipelagic network (Lima-Mendez *et al.*,  
307 2015).

308 To conclude, our network-based exploration disentangles the spatial distribution of  
309 associations of the global ocean microbiome, from top to bottom layers, suggesting both global and  
310 regional interactions. Our analysis demonstrated the change of network topology across vertical (water  
311 column) and horizontal (different regions) dimensions of the ocean. Furthermore, our results indicate  
312 that associations have specific spatial distributions that are not just mirroring ASV distributions.

313

## 314 **METHODS**

### 315 *Dataset*

316 Samples originated from two expeditions, Malaspina-2010 (Duarte, 2015) and Hotmix (Martínez-  
317 Pérez *et al.*, 2017). The former was onboard the R/V Hespérides and most ocean basins were sampled  
318 between December 2010 and July 2011. Malaspina samples included i) *MalaSurf*, surface samples  
319 (Ruiz-González *et al.*, 2019; Logares *et al.*, 2020), ii) *MalaVP*, vertical profiles (Giner *et al.*, 2020),  
320 and iii) *MalaDeep*, deep-sea samples, (Pernice *et al.*, 2016; Salazar *et al.*, 2016; Sanz-Sáez, 2021). For  
321 the Hotmix expedition, sampling took place onboard the R/V Sarmiento de Gamboa between 27th  
322 April and 29th May 2014 and represented a quasi-synoptic transect across the MS and the adjacent  
323 North-East of the NAO. See details in Table 2.

324 DNA extractions are indicated in the papers associated with each dataset (Table 2). From the  
325 DNA extractions, the 16S and 18S rRNA genes were amplified and sequenced. PCR amplification and  
326 sequencing of *MalaSurf*, *MalaVP* (18S), and *Hotmix* (16S) are indicated in the papers associated with  
327 each dataset in Table 2. *MalaVP* (16S) and *Hotmix* (18S) were PCR-amplified and sequenced  
328 following the same approach as in (Logares *et al.*, 2020). *MalaDeep* samples were obtained from  
329 (Pernice *et al.*, 2016; Salazar *et al.*, 2016) but re-sequenced in Genoscope (France) with different  
330 primers, as described below. *MalaSurf*, *MalaVP* and *Hotmix* datasets were sequenced at RTL  
331 Genomics (Texas, USA).

332 We used the same amplification primers for all samples. For the 16S, we amplified the V4-V5  
333 hypervariable region using the primers 515F-Y and 926R (Parada *et al.*, 2016). For the 18S, we  
334 amplified the V4 hypervariable region with the primers TAREukFWD1 and TAREukREV3 (Stoeck *et al.*,  
335 2010). See more details in (Logares *et al.*, 2020). Amplicons were sequenced in *Illumina* MiSeq  
336 or HiSeq2500 platforms (2x250 or 2x300 bp reads). Operational Taxonomic Units were delineated as  
337 Amplicon Sequence Variants (ASVs) using DADA2 (Callahan *et al.*, 2016), running each dataset  
338 separately before merging the results. ASVs were assigned taxonomy using SILVA (Quast *et al.*,

339 2012), v132, for prokaryotes, and PR2 (Guillou *et al.*, 2012), v4.11.1, for eukaryotes. ASVs  
340 corresponding to Plastids, Mitochondria, Metazoa, and Plantae, were removed. Only samples with at  
341 least 2000 reads were kept. The dataset contained several *MalaDeep* replicates, which we merged, and  
342 two filter sizes: given the cell sizes of prokaryotes versus microeukaryotes, we selected the smallest  
343 available filter size (0.2-0.8  $\mu\text{m}$ ) for prokaryotes and the larger one (0.8-20  $\mu\text{m}$ ) for microeukaryotes.  
344 The other three datasets used filter sizes of 0.2-3  $\mu\text{m}$ . Additionally, we required that samples had  
345 eukaryotic and prokaryotic data, resulting in 397 samples for downstream analysis: 122 *MalaSurf*, 83  
346 *MalaVP*, 13 *MalaDeep*, and 179 *Hotmix*. We separated the samples into epipelagic, mesopelagic and  
347 bathypelagic zone (Figure 1). Furthermore, we separated most epipelagic samples into surface and  
348 deep-chlorophyll maximum (DCM) samples, but 18 MS and 4 NAO samples belonged to neither. We  
349 also considered environmental variables: Temperature (2 missing values = mv), salinity (2 mv),  
350 fluorescence (3 mv), and inorganic nutrients  $\text{NO}_3^-$  (36 mv),  $\text{PO}_4^{3-}$  (38 mv), and  $\text{SiO}_2$  (37 mv), which  
351 were measured as indicated elsewhere (Giner *et al.*, 2020; Logares *et al.*, 2020; Sebastián, Ortega-  
352 Retuerta, *et al.*, 2021). In specific samples, missing data on nutrient concentrations were estimated  
353 from the World Ocean Database (Boyer *et al.*, 2013).

354

### 355 *Single static network*

356 We constructed the single static network in four steps. First, we prepared the data for network  
357 construction. We excluded rare microorganisms by keeping ASVs with a sequence abundance sum  
358 above 100 reads and appearing in at least 20 samples (>5%). The latter condition removes bigger  
359 eukaryotes only appearing in the 13 *MalaDeep* eukaryotic samples of a bigger size fraction. To control  
360 for data compositionality (Gloor *et al.*, 2017), we applied a centered-log-ratio transformation  
361 separately to the prokaryotic and eukaryotic tables before merging them.

362         Second, we inferred a (preliminary) network using FlashWeave (Tackmann *et al.*, 2019),  
363 selecting the options “heterogeneous” and “sensitive”. FlashWeave was chosen as it can handle sparse

364 datasets like ours, taking zeros into account and avoiding spurious correlations between ASVs that  
365 share many zeros.

366 Third, we aimed to remove environmentally-driven edges. FlashWeave could detect indirect  
367 edges and allows to supply additional metadata such as environmental variables, but currently does  
368 not support missing data. Thus, we applied EnDED (Deutschmann et al. 2020), combining the methods  
369 Interaction Information (with 0.05 significance threshold and 10000 iterations) and Data Processing  
370 Inequality as done previously via artificially-inserted edges to connect all microbial nodes to the six  
371 environmental parameters (Deutschmann *et al.*, 2021). Although EnDED can handle missing  
372 environmental data when calculating intermediate values relating ASV and environmental factors, it  
373 would compute intermediate values for microbial edges using all samples. Thus, to avoid a possible  
374 bias and speed up the calculation process, we applied EnDED individually for each environmental  
375 factor, using only the samples containing values for the specific environmental factor.

376 Fourth, we removed isolated nodes, i.e., nodes without any edge. The resulting network  
377 represented the single static network in our study.

378

### 379 *Sample-specific subnetwork*

380 We constructed 397 sample-specific subnetworks. Each subnetwork represented one sample and was  
381 derived from the single static network, i.e., a subnetwork contained nodes and edges present in the  
382 single static network but not vice versa. Consider sample  $s_{RL}$  with  $R$  being the marine region, and  $L$   
383 the sample's depth layer. Let  $e$  be an association between microorganisms  $A$  and  $B$ . Then, association  
384  $e$  is present in the sample-specific subnetwork  $N_s$ , if

- 385 i.  $e$  is an association in the single static network,
- 386 ii. the microorganisms  $A$  and  $B$  are present within sample  $s$ , i.e., the abundances are above zero  
387 within that particular sample, and
- 388 iii. the association has a region and depth specific Jaccard index,  $J_{RL}$ , above 20% (see below).



389 In addition to these three conditions, a node is present in a sample-specific subnetwork when connected  
390 to at least one edge, i.e., we removed isolated nodes.

391       Regarding the third condition, we determined  $J_{RL}$  for each association pair by computing within  
392 each region and depth layer, the fraction of samples two microorganisms appeared together  
393 (intersection) from the total samples at least one microorganism appears (union). Supplementary Table  
394 4 shows the number of edges using different thresholds. Given the heterogeneity of the dataset within  
395 regions and depth layers, we decided to use a low threshold, keeping edges with a Jaccard index above  
396 20% and removed edges below or equal to 20%. We tested robustness by randomly drawing a subset  
397 of samples from each region and depth combination. The subset contained between 10% and 90% of  
398 the original samples. We rounded up decimal numbers to avoid zero sample subsets, e.g., 10% of 7  
399 samples results in a subset of 1 sample. We excluded the DCM of the SPO because it contained only  
400 one sample. Next, we recomputed the Jaccard index for the random subset. Lastly, requiring  $J > 20\%$ ,  
401 we evaluated robustness determining i) how many edges were kept in the random subsamples  
402 compared to all samples, and ii) how many edges were kept in the random subset that were also kept  
403 when all samples were used. We repeated the procedure for each region-depth combination 1000 times.

404

#### 405 *Spatial recurrence*

406 To determine an association's spatial recurrence, we calculated its prevalence as the fraction of  
407 subnetworks in which the association was present. We determined association prevalence across the  
408 397 samples and each region-layer combination. We mapped the scores onto the single static network,  
409 visualized in Gephi (Bastian *et al.*, 2009), v.0.9.2, using the Fruchterman Reingold Layout  
410 (Fruchterman & Reingold, 1991) with a low gravity score of 0.5. We used the region-layer prevalence  
411 to determine global and regional associations. We considered an association to be global within a  
412 specific depth layer if its prevalence was above 70% in all regions. In turn, a regional association had  
413 an association prevalence above 0% within a particular region-layer (present, appearing in at least one

414 subnetwork) and 0% within other regions of the same layer (absent, appearing in no subnetwork). In  
415 addition, associations that are not global but appear in all regions over 50% are considered prevalent.  
416 Similarly, associations that are not global nor prevalent but appear in all regions over 20% are  
417 considered low-frequency. Thus, an association can be classified as i) global, ii) regional, iii) prevalent,  
418 iv) low-frequency, and v) “other”, i.e., associations that have not been classified into the previous  
419 categories.

420

#### 421 *Global network metrics*

422 We considered the *number of nodes* and *edges* and six other global network metrics of which most  
423 were computed with functions of the igraph R-package (Csardi & Nepusz, 2006). *Edge density*  
424 indicating connectivity is computed through the number of actual edges divided by the number of  
425 possible edges. The *average path length* is the average length of all shortest paths between nodes in a  
426 network. *Transitivity* indicating how well a network is clustered is the probability that the nodes’  
427 neighbors are connected. *Assortativity* measures if similar nodes tend to be connected, i.e., *assortativity*  
428 (*degree*) is positive if high degree nodes tend to connect to other high degree nodes and negative  
429 otherwise. Similarly, *assortativity (Euk-Prok)* is positive if eukaryotes tend to connect to other  
430 eukaryotes and prokaryotes tend to connect to other prokaryotes. Lastly, we computed the *average*  
431 *positive association strength* as the mean of all positive association scores provided by FlashWeave.

432

#### 433 *Local network metric*

434 The previous global metrics disregard local structures’ complexity, and topological analyses should  
435 include local metrics (Espejo *et al.*, 2020), e.g., graphlets (Pržulj *et al.*, 2004). Here, we determined  
436 network-dissimilarity between each pair of sample-specific subnetworks as proposed in (Yaveroğlu *et*  
437 *al.*, 2014), comparing network topology without considering specific ASVs. The network-dissimilarity

438 is a distance measurement that is always positive: 0 if networks are identical and greater numbers  
439 indicate greater dissimilarity.

440 Next, we constructed a Network Similarity Network (NSN), where each node is a subnetwork  
441 and each node connects with all other nodes, i.e., the NSN was a complete graph. We assigned the  
442 network-dissimilarity score as edge weight within the NSN. To simplify the NSN while preserving its  
443 main patterns, we determined the minimal spanning tree (MST) of the NSN. The MST had 397 nodes  
444 and 396 edges. The MST is a backbone, with no circular path, in which the edges are chosen so that  
445 the edge weights sum is minimal and all nodes are connected, i.e., a path exists between any two nodes.  
446 We determined the MST using the function *mst* in the *igraph* package in R (Prim, 1957; Csardi &  
447 Nepusz, 2006).

448 Using the network-dissimilarity (distance) matrix, we determined clusters of similar  
449 subnetworks in python. First, we reduced the matrix to ten dimension using *umap* (McInnes *et al.*,  
450 2018) with the following parameter settings: *n\_neighbors*=3, *min\_dist*=0, *n\_components*=10,  
451 *random\_state*=123, and *metric*='precomputed'. Second, we clustered the subnetworks (represented via  
452 ten dimensions) with *hdbscan* (McInnes *et al.*, 2017) setting the parameters to *min\_samples*=3 and  
453 *min\_clusters*=5.

454

#### 455 *Reproducibility*

456 R-Markdowns for data analysis including commands to run FlashWeave and EnDED  
457 (environmentally-driven-edge-detection and computing Jaccard index) are publicly available:  
458 <https://github.com/InaMariaDeutschmann/GlobalNetworkMalaspinaHotmix>. While the networks are  
459 already available, the microbial sequence abundances (ASV table), taxonomic classifications,  
460 environmental data including nutrients will be publicly available after acceptance. The data are of  
461 course available upon request to reviewers.

462

## 463 **Acknowledgements**

464 We thank all members of the Malaspina and Hotmix expeditions with the multiple projects funding  
465 these collaborative efforts. Sampling was carried out thanks to the Consolider-Ingenio programme  
466 (project Malaspina 2010 Expedition, ref. CSD2008–00077) and HOTMIX project (CTM2011-  
467 30010/MAR), funded by the Spanish Ministry of Economy and Competitiveness Science and  
468 Innovation. Part of the analyses have been performed at the Marbits bioinformatics core at ICM-CSIC  
469 (<https://marbits.icm.csic.es>). This project and IMD received funding from the European Union's  
470 Horizon 2020 research and innovation program under the Marie Skłodowska-Curie grant agreement  
471 no. 675752 (ESR2, <http://www.singek.eu>) to RL. RL was supported by a Ramón y Cajal fellowship  
472 (RYC-2013-12554, MINECO, Spain). This work was also supported by the projects  
473 INTERACTOMICS (CTM2015-69936-P, MINECO, Spain), MicroEcoSystems (240904, RCN,  
474 Norway) and MINIME (PID2019-105775RB-I00, AEI, Spain) to RL. SC was supported by the CNRS  
475 MITI through the interdisciplinary program Modélisation du Vivant (GOBITMAP grant). SC, DE and  
476 SGA were funded by the H2020 project AtlantECO (award number 862923).

477

## 478 **Author's contributions**

479 The overall project was conceived and designed by RL. JMG, CMD, SGA, RM, JA were responsible  
480 for the sampling and acquisition of contextual data. CRG, JP and MS processed specific samples in  
481 the laboratory. RL processed the amplicon data generating the two ASV tables. They were the starting  
482 point of the present study, which is part of the overall project. IMD developed the conceptual approach  
483 and DE, SC, and RL contributed to its finalization. IMD performed the data analysis. ED, MS, CMD,  
484 SGA, RM, JMG, DE, SC, and RL contributed with interpretation of the results. IMD wrote the original  
485 draft. All authors contributed to manuscript revisions and approved the final version of the manuscript.

486

487 **Competing interests:** The authors declare that they have no competing interests.

488 **REFERENCES**

- 489 ACINAS, S.G., SÁNCHEZ, P., SALAZAR, G., CORNEJO-CASTILLO, F.M., SEBASTIÁN, M., LOGARES, R., ROYO-LLONCH,  
490 M., PAOLI, L., SUNAGAWA, S., HINGAMP, P., OGATA, H., LIMA-MENDEZ, G., ROUX, S., GONZÁLEZ, J.M.,  
491 ARRIETA, J.M., ALAM, I.S., KAMAU, A., BOWLER, C., RAES, J., PESANT, S., BORK, P., AGUSTÍ, S., GOJOBORI,  
492 T., VAQUÉ, D., SULLIVAN, M.B., PEDRÓS-ALIÓ, C., MASSANA, R., DUARTE, C.M., & GASOL, J.M. (2021)  
493 Deep ocean metagenomes provide insight into the metabolic architecture of bathypelagic  
494 microbial communities. *Communications Biology*, **4**, 604.
- 495 AGUSTI, S., GONZÁLEZ-GORDILLO, J.I., VAQUÉ, D., ESTRADA, M., CEREZO, M.I., SALAZAR, G., GASOL, J.M., &  
496 DUARTE, C.M. (2015) Ubiquitous healthy diatoms in the deep sea confirm deep carbon  
497 injection by the biological pump. *Nature Communications*, **6**, 7608.
- 498 ARÍSTEGUI, J., GASOL, J.M., DUARTE, C.M., & HERNDLD, G.J. (2009) Microbial oceanography of the dark  
499 ocean's pelagic realm. *Limnology and Oceanography*, **54**, 1501–1529.
- 500 BALDAUF, S.L. (2008) An overview of the phylogeny and diversity of eukaryotes. *Journal of Systematics*  
501 *and Evolution*, **46**, 263.
- 502 BASTIAN, M., HEYMANN, S., & JACOMY, M. (2009) Gephi: An Open Source Software for Exploring and  
503 Manipulating Networks. *ICWSM*, **3**.
- 504 BJORBÆKMO, M.F.M., EVENSTAD, A., RØSÆG, L.L., KRABBERØD, A.K., & LOGARES, R. (2019) The planktonic  
505 protist interactome: where do we stand after a century of research? *The ISME Journal*, DOI:  
506 10.1038/s41396-019-0542-5.
- 507 BOEUF, D., EDWARDS, B.R., EPPLEY, J.M., HU, S.K., POFF, K.E., ROMANO, A.E., CARON, D.A., KARL, D.M., &  
508 DELONG, E.F. (2019) Biological composition and microbial dynamics of sinking particulate  
509 organic matter at abyssal depths in the oligotrophic open ocean. *Proc Natl Acad Sci USA*, **116**,  
510 11824.
- 511 BOYER, T.P., ANTONOV, J.I., BARANOVA, O.K., GARCIA, H.E., JOHNSON, D.R., MISHONOV, A.V., O'BRIEN, T.D.,  
512 SEIDOV, D., 1948-, SMOLYAR, I. (Igor), ZWENG, M.M., PAVER, C.R., LOCARNINI, R.A., REAGAN, J.R.,  
513 FORGY, C. (Carla), GRODSKY, A., & LEVITUS, S. (2013) World ocean database 2013. NOAA atlas  
514 NESDIS ; 72, DOI: 10.7289/V5NZ85MT.
- 515 CALLAHAN, B.J., MCMURDIE, P.J., ROSEN, M.J., HAN, A.W., JOHNSON, A.J.A., & HOLMES, S.P. (2016) DADA2:  
516 High-resolution sample inference from Illumina amplicon data. *Nature Methods*, **13**, 581–583.
- 517 CHAFFRON, S., DELAGE, E., BUDINICH, M., VINTACHE, D., HENRY, N., NEF, C., ARDYNA, M., ZAYED, A.A., JUNGER,  
518 P.C., GALAND, P.E., LOVEJOY, C., MURRAY, A., SARMENTO, H., ACINAS, S., BABIN, M., IUDICONE, D.,  
519 JAILLON, O., KARSENTI, E., WINCKER, P., KARP-BOSS, L., SULLIVAN, M.B., BOWLER, C., DE VARGAS, C., &  
520 EVEILLARD, D. (2020) Environmental vulnerability of the global ocean plankton community  
521 interactome. *bioRxiv*, 2020.11.09.375295.
- 522 CHOW, C.-E.T., KIM, D.Y., SACHDEVA, R., CARON, D.A., & FUHRMAN, J.A. (2014) Top-down controls on  
523 bacterial community structure: microbial network analysis of bacteria, T4-like viruses and  
524 protists. *The ISME Journal*, **8**, 816–829.
- 525 CHOW, C.-E.T., SACHDEVA, R., CRAM, J.A., STEELE, J.A., NEEDHAM, D.M., PATEL, A., PARADA, A.E., & FUHRMAN,  
526 J.A. (2013) Temporal variability and coherence of euphotic zone bacterial communities over  
527 a decade in the Southern California Bight. *The ISME Journal*, **7**, 2259–2273.
- 528 COUTINHO, F.H., MEIRELLES, P.M., MOREIRA, A.P.B., PARANHOS, R.P., DUTILH, B.E., & THOMPSON, F.L. (2015)  
529 Niche distribution and influence of environmental parameters in marine microbial  
530 communities: a systematic review. *PeerJ*, **3**, e1008.
- 531 CRAM, J.A., XIA, L.C., NEEDHAM, D.M., SACHDEVA, R., SUN, F., & FUHRMAN, J.A. (2015) Cross-depth analysis  
532 of marine bacterial networks suggests downward propagation of temporal changes. *The ISME*  
533 *Journal*, **9**, 2573–2586.

- 534 CSARDI, G. & NEPUZS, T. (2006) The igraph software package for complex network research.  
535 *InterJournal, Complex Systems*, 1695.
- 536 DELONG, E.F. (2009) The microbial ocean from genomes to biomes. *Nature*.
- 537 DEUTSCHMANN, I., KRABBERØD, A.K., BENITES, L.F., LATORRE, F., DELAGE, E., MARRASÉ, C., BALAGUÉ, V., GASOL,  
538 J.M., MASSANA, R., EVEILLARD, D., CHAFFRON, S., & LOGARES, R. (2021) Disentangling temporal  
539 associations in marine microbial networks. *Research Square*, DOI: 10.21203/rs.3.rs-  
540 404332/v1.
- 541 DUARTE, C.M. (2015) Seafaring in the 21st Century: The Malaspina 2010 Circumnavigation Expedition.  
542 *Limnology and Oceanography Bulletin*, **24**, 11–14.
- 543 ESPEJO, R., MESTRE, G., POSTIGO, F., LUMBRERAS, S., RAMOS, A., HUANG, T., & BOMPARD, E. (2020) Exploiting  
544 graphlet decomposition to explain the structure of complex networks: the GHuST framework.  
545 *Scientific Reports*, **10**, 12884.
- 546 FALKOWSKI, P.G., FENCHEL, T., & DELONG, E.F. (2008) The Microbial Engines That Drive Earth's  
547 Biogeochemical Cycles. *Science*.
- 548 FRUCHTERMAN, T.M.J. & REINGOLD, E.M. (1991) Graph drawing by force-directed placement. *Software:  
549 Practice and Experience*, **21**, 1129–1164.
- 550 GINER, C.R., PERNICE, M.C., BALAGUÉ, V., DUARTE, C.M., GASOL, J.M., LOGARES, R., & MASSANA, R. (2020)  
551 Marked changes in diversity and relative activity of picoeukaryotes with depth in the world  
552 ocean. *The ISME Journal*, **14**, 437–449.
- 553 GLOOR, G.B., MACKLAIM, J.M., PAWLOWSKY-GLAHN, V., & EGOZCUE, J.J. (2017) Microbiome Datasets Are  
554 Compositional: And This Is Not Optional. *Frontiers in Microbiology*, **8**, 2224.
- 555 GUILLOU, L., BACHAR, D., AUDIC, S., BASS, D., BERNEY, C., BITTNER, L., BOUTTE, C., BURGAUD, G., DE VARGAS, C.,  
556 DECELLE, J., DEL CAMPO, J., DOLAN, J.R., DUNTHORN, M., EDVARDSEN, B., HOLZMANN, M., KOOISTRA,  
557 W.H.C.F., LARA, E., LE BESCOT, N., LOGARES, R., MAHÉ, F., MASSANA, R., MONTRESOR, M., MORARD, R.,  
558 NOT, F., PAWLOWSKI, J., PROBERT, I., SAUVADET, A.-L., SIANO, R., STOECK, T., VAULOT, D., ZIMMERMANN,  
559 P., & CHRISTEN, R. (2012) The Protist Ribosomal Reference database (PR<sup>2</sup>): a catalog of  
560 unicellular eukaryote Small Sub-Unit rRNA sequences with curated taxonomy. *Nucleic Acids  
561 Research*, **41**, D597–D604.
- 562 HANSELL, D.A. & CARLSON, C.A. (1998) Deep-ocean gradients in the concentration of dissolved organic  
563 carbon. *Nature*, **395**, 263–266.
- 564 IBARBALZ, F.M., HENRY, N., BRANDÃO, M.C., MARTINI, S., BUSSENI, G., BYRNE, H., COELHO, L.P., ENDO, H., GASOL,  
565 J.M., GREGORY, A.C., MAHÉ, F., RIGONATO, J., ROYO-LLOCH, M., SALAZAR, G., SANZ-SÁEZ, I., SCALCO,  
566 E., SOVIADAN, D., ZAYED, A.A., ZINGONE, A., LABADIE, K., FERLAND, J., MAREC, C., KANDELS, S., PICALER,  
567 M., DIMIER, C., POULAIN, J., PISAREV, S., CARMICHAEL, M., PESANT, S., ACINAS, S.G., BABIN, M., BORK,  
568 P., BOSS, E., BOWLER, C., COCHRANE, G., VARGAS, C. de, FOLLOWS, M., GORSKY, G., GRIMSLEY, N., GUIDI,  
569 L., HINGAMP, P., IUDICONE, D., JAILLON, O., KANDELS, S., KARP-BOSS, L., KARSENTI, E., NOT, F., OGATA,  
570 H., PESANT, S., POULTON, N., RAES, J., SARDET, C., SPEICH, S., STEMMANN, L., SULLIVAN, M.B.,  
571 SUNAGAWA, S., WINCKER, P., BABIN, M., BOSS, E., IUDICONE, D., JAILLON, O., ACINAS, S.G., OGATA, H.,  
572 PELLETIER, E., STEMMANN, L., SULLIVAN, M.B., SUNAGAWA, S., BOPP, L., VARGAS, C. de, KARP-BOSS, L.,  
573 WINCKER, P., LOMBARD, F., BOWLER, C., & ZINGER, L. (2019) Global Trends in Marine Plankton  
574 Diversity across Kingdoms of Life. *Cell*, **179**, 1084-1097.e21.
- 575 KRABBERØD, A.K., BJORBÆKMO, M.F.M., SHALCHIAN-TABRIZI, K., & LOGARES, R. (2017) Exploring the oceanic  
576 microeukaryotic interactome with metaomics approaches. *Aquatic Microbial Ecology*, **79**, 1–  
577 12.
- 578 KRABBERØD, A.K., DEUTSCHMANN, I.M., BJORBÆKMO, M.F.M., BALAGUÉ, V., GINER, C.R., FERRERA, I., GARCÉS,  
579 E., MASSANA, R., GASOL, J.M., & LOGARES, R. (2021) Long-term patterns of an interconnected  
580 core marine microbiota. *bioRxiv*, 2021.03.18.435965.

- 581 LAYEGHIFARD, M., HWANG, D.M., & GUTTMAN, D.S. (2017) Disentangling Interactions in the Microbiome:  
582 A Network Perspective. *Trends in Microbiology*.
- 583 LEWIS, W.H., TAHON, G., GEESINK, P., SOUSA, D.Z., & ETTEMA, T.J.G. (2020) Innovations to culturing the  
584 uncultured microbial majority. *Nature Reviews Microbiology*, DOI: 10.1038/s41579-020-  
585 00458-8.
- 586 LIMA-MENDEZ, G., FAUST, K., HENRY, N., DECELLE, J., COLIN, S., CARCILLO, F., CHAFFRON, S., IGNACIO-ESPINOSA,  
587 J.C., ROUX, S., VINCENT, F., BITTNER, L., DARZI, Y., WANG, J., AUDIC, S., BERLINE, L., BONTEMPI, G.,  
588 CABELLO, A.M., COPPOLA, L., CORNEJO-CASTILLO, F.M., D'OVIDIO, F., DE MEESTER, L., FERRERA, I., GARET-  
589 DELMAS, M.-J., GUIDI, L., LARA, E., PESANT, S., ROYO-LLOCH, M., SALAZAR, G., SÁNCHEZ, P., SEBASTIAN,  
590 M., SOUFFREAU, C., DIMIER, C., PICHERAL, M., SEARSON, S., KANDELS-LEWIS, S., GORSKY, G., NOT, F.,  
591 OGATA, H., SPEICH, S., STEMMANN, L., WEISSENBACH, J., WINCKER, P., ACINAS, S.G., SUNAGAWA, S., BORK,  
592 P., SULLIVAN, M.B., KARSENTI, E., BOWLER, C., DE VARGAS, C., & RAES, J. (2015) Determinants of  
593 community structure in the global plankton interactome. *Science*, **348**, 1262073.
- 594 LOGARES, R., DEUTSCHMANN, I.M., JUNGER, P.C., GINER, C.R., KRABBERØD, A.K., SCHMIDT, T.S.B., RUBINAT-  
595 RIPOLL, L., MESTRE, M., SALAZAR, G., RUIZ-GONZÁLEZ, C., SEBASTIÁN, M., DE VARGAS, C., ACINAS, S.G.,  
596 DUARTE, C.M., GASOL, J.M., & MASSANA, R. (2020) Disentangling the mechanisms shaping the  
597 surface ocean microbiota. *Microbiome*, **8**, 55.
- 598 MANDAKOVIC, D., ROJAS, C., MALDONADO, J., LATORRE, M., TRAVISANY, D., DELAGE, E., BIHOUEE, A., JEAN, G.,  
599 DÍAZ, F.P., FERNÁNDEZ-GÓMEZ, B., CABRERA, P., GAETE, A., LATORRE, C., GUTIÉRREZ, R.A., MAASS, A.,  
600 CAMBIAZO, V., NAVARRETE, S.A., EVEILLARD, D., & GONZÁLEZ, M. (2018) Structure and co-occurrence  
601 patterns in microbial communities under acute environmental stress reveal ecological factors  
602 fostering resilience. *Scientific Reports*, **8**, 5875.
- 603 MARTÍNEZ-PÉREZ, A.M., OSTERHOLZ, H., NIETO-CID, M., ÁLVAREZ, M., DITTMAR, T., & ÁLVAREZ-SALGADO, X.A.  
604 (2017) Molecular composition of dissolved organic matter in the Mediterranean Sea.  
605 *Limnology and Oceanography*, **62**, 2699–2712.
- 606 MASSANA, R. & LOGARES, R. (2013) Eukaryotic versus prokaryotic marine picoplankton ecology.  
607 *Environmental Microbiology*, **15**, 1254–1261.
- 608 MCINNES, L., HEALY, J., & ASTELS, S. (2017) hdbSCAN: Hierarchical density based clustering. *The Journal*  
609 *of Open Source Software*, **2**, 205.
- 610 MCINNES, L., HEALY, J., SAUL, N., & GROSSBERGER, L. (2018) UMAP: Uniform Manifold Approximation and  
611 Projection. *The Journal of Open Source Software*, **3**, 861.
- 612 MESTRE, M., RUIZ-GONZÁLEZ, C., LOGARES, R., DUARTE, C.M., GASOL, J.M., & SALA, M.M. (2018) Sinking  
613 particles promote vertical connectivity in the ocean microbiome. *Proc Natl Acad Sci USA*, **115**,  
614 E6799.
- 615 MILICI, M., DENG, Z.-L., TOMASCH, J., DECELLE, J., WOS-OXLEY, M.L., WANG, H., JÁUREGUI, R., PLUMEIER, I.,  
616 GIEBEL, H.-A., BADEWIEN, T.H., WURST, M., PIEPER, D.H., SIMON, M., & WAGNER-DÖBLER, I. (2016)  
617 Co-occurrence Analysis of Microbial Taxa in the Atlantic Ocean Reveals High Connectivity in  
618 the Free-Living Bacterioplankton. *Frontiers in Microbiology*, **7**, 649.
- 619 NEEDHAM, D.M., SACHDEVA, R., & FUHRMAN, J.A. (2017) Ecological dynamics and co-occurrence among  
620 marine phytoplankton, bacteria and myoviruses shows microdiversity matters. *The ISME*  
621 *Journal*, **11**, 1614–1629.
- 622 PARADA, A.E. & FUHRMAN, J.A. (2017) Marine archaeal dynamics and interactions with the microbial  
623 community over 5 years from surface to seafloor. *The ISME Journal*, **11**, 2510–2525.
- 624 PARADA, A.E., NEEDHAM, D.M., & FUHRMAN, J.A. (2016) Every base matters: assessing small subunit rRNA  
625 primers for marine microbiomes with mock communities, time series and global field  
626 samples. *Environmental Microbiology*, **18**, 1403–1414.

- 627 PEOPLES, L.M., DONALDSON, S., OSUNTOKUN, O., XIA, Q., NELSON, A., BLANTON, J., ALLEN, E.E., CHURCH, M.J.,  
628 & BARTLETT, D.H. (2018) Vertically distinct microbial communities in the Mariana and  
629 Kermadec trenches. *PLOS ONE*, **13**, 1–21.
- 630 PERNICE, M.C., GINER, C.R., LOGARES, R., PERERA-BEL, J., ACINAS, S.G., DUARTE, C.M., GASOL, J.M., & MASSANA,  
631 R. (2016) Large variability of bathypelagic microbial eukaryotic communities across the  
632 world's oceans. *The ISME Journal*, **10**, 945–958.
- 633 POISOT, T., CANARD, E., MOUILLOT, D., MOUQUET, N., & GRAVEL, D. (2012) The dissimilarity of species  
634 interaction networks. *Ecology Letters*, **15**, 1353–1361.
- 635 PRIM, R.C. (1957) Shortest connection networks and some generalizations. *The Bell System Technical*  
636 *Journal*, **36**, 1389–1401.
- 637 PRŽULJ, N., CORNEIL, D.G., & JURISICA, I. (2004) Modeling interactome: scale-free or geometric?  
638 *Bioinformatics*, **20**, 3508–3515.
- 639 QUAST, C., PRUESSE, E., YILMAZ, P., GERKEN, J., SCHWEER, T., YARZA, P., PEPLIES, J., & GLÖCKNER, F.O. (2012)  
640 The SILVA ribosomal RNA gene database project: improved data processing and web-based  
641 tools. *Nucleic Acids Research*, **41**, D590–D596.
- 642 ROYO-LLONCH, M., SÁNCHEZ, P., RUIZ-GONZÁLEZ, C., SALAZAR, G., PEDRÓS-ALIÓ, C., LABADIE, K., PAOLI, L.,  
643 CHAFFRON, S., EVEILLARD, D., KARSENTI, E., SUNAGAWA, S., WINCKER, P., KARP-BOSS, L., BOWLER, C., &  
644 ACINAS, S.G. (2020) Ecogenomics of key prokaryotes in the arctic ocean. *bioRxiv*,  
645 2020.06.19.156794.
- 646 RUIZ-GONZÁLEZ, C., LOGARES, R., SEBASTIÁN, M., MESTRE, M., RODRÍGUEZ-MARTÍNEZ, R., GALÍ, M., SALA, M.M.,  
647 ACINAS, S.G., DUARTE, C.M., & GASOL, J.M. (2019) Higher contribution of globally rare bacterial  
648 taxa reflects environmental transitions across the surface ocean. *Molecular Ecology*, **28**,  
649 1930–1945.
- 650 RUIZ-GONZÁLEZ, C., MESTRE, M., ESTRADA, M., SEBASTIÁN, M., SALAZAR, G., AGUSTÍ, S., MORENO-OSTOS, E.,  
651 RECHE, I., ÁLVAREZ-SALGADO, X.A., MORÁN, X.A.G., DUARTE, C.M., SALA, M.M., & GASOL, J.M. (2020)  
652 Major imprint of surface plankton on deep ocean prokaryotic structure and activity.  
653 *Molecular Ecology*, **29**, 1820–1838.
- 654 SALAZAR, G., CORNEJO-CASTILLO, F.M., BENÍTEZ-BARRIOS, V., FRAILE-NUEZ, E., ÁLVAREZ-SALGADO, X.A., DUARTE,  
655 C.M., GASOL, J.M., & ACINAS, S.G. (2016) Global diversity and biogeography of deep-sea pelagic  
656 prokaryotes. *The ISME Journal*, **10**, 596–608.
- 657 SALAZAR, G., PAOLI, L., ALBERTI, A., HUERTA-CEPAS, J., RUSCHEWEYH, H.-J., CUENCA, M., FIELD, C.M., COELHO,  
658 L.P., CRUAUD, C., ENGELEN, S., GREGORY, A.C., LABADIE, K., MAREC, C., PELLETIER, E., ROYO-LLONCH, M.,  
659 ROUX, S., SÁNCHEZ, P., UEHARA, H., ZAYED, A.A., ZELLER, G., CARMICHAEL, M., DIMIER, C., FERLAND, J.,  
660 KANDELS, S., PIPHERAL, M., PISAREV, S., POULAIN, J., ACINAS, S.G., BABIN, M., BORK, P., BOSS, E.,  
661 BOWLER, C., COCHRANE, G., VARGAS, C. de, FOLLOWS, M., GORSKY, G., GRIMSLEY, N., GUIDI, L., HINGAMP,  
662 P., IUDICONE, D., JAILLON, O., KANDELS-LEWIS, S., KARP-BOSS, L., KARSENTI, E., NOT, F., OGATA, H.,  
663 PESANT, S., POULTON, N., RAES, J., SARDET, C., SPEICH, S., STEMMANN, L., SULLIVAN, M.B., SUNAGAWA,  
664 S., WINCKER, P., ACINAS, S.G., BABIN, M., BORK, P., BOWLER, C., VARGAS, C. de, GUIDI, L., HINGAMP, P.,  
665 IUDICONE, D., KARP-BOSS, L., KARSENTI, E., OGATA, H., PESANT, S., SPEICH, S., SULLIVAN, M.B., WINCKER,  
666 P., & SUNAGAWA, S. (2019) Gene Expression Changes and Community Turnover Differentially  
667 Shape the Global Ocean Metatranscriptome. *Cell*, **179**, 1068–1083.e21.
- 668 SANZ-SÁEZ, I. (2021) Contribution of marine heterotrophic cultured bacteria to microbial diversity and  
669 mercury detoxification.
- 670 SEBASTIÁN, M., ORTEGA-RETUERTA, E., GÓMEZ-CONSARNAU, L., ZAMANILLO, M., ÁLVAREZ, M., ARÍSTEGUI, J., &  
671 GASOL, J.M. (2021) Environmental and physical barriers drive the basin-wide spatial  
672 structuring of Mediterranean Sea and adjacent Eastern Atlantic Ocean prokaryotic  
673 communities. *Submitted*.



- 674 SEBASTIÁN, M., SÁNCHEZ, P., SALAZAR, G., ÁLVAREZ-SALGADO, X.A., RECHE, I., MORÁN, X.A.G., SALA, M.M.,  
675 DUARTE, C.M., ACINAS, S.G., & GASOL, J.M. (2021) The quality of dissolved organic matter shapes  
676 the biogeography of the active bathypelagic microbiome. *bioRxiv*, 2021.05.14.444136.
- 677 SEYMOUR, J.R., AMIN, S.A., RAINA, J.-B., & STOCKER, R. (2017) Zooming in on the phycosphere: the  
678 ecological interface for phytoplankton–bacteria relationships. *Nature Microbiology*, **2**, 17065.
- 679 SHADE, A. & HANDELSMAN, J. (2012) Beyond the Venn diagram: the hunt for a core microbiome.  
680 *Environmental Microbiology*, **14**, 4–12.
- 681 STEELE, J.A., COUNTWAY, P.D., XIA, L., VIGIL, P.D., BEMAN, J.M., KIM, D.Y., CHOW, C.-E.T., SACHDEVA, R., JONES,  
682 A.C., SCHWALBACH, M.S., ROSE, J.M., HEWSON, I., PATEL, A., SUN, F., CARON, D.A., & FUHRMAN, J.A.  
683 (2011) Marine bacterial, archaeal and protistan association networks reveal ecological  
684 linkages. *The ISME Journal*, **5**, 1414–1425.
- 685 STOECK, T., BASS, D., NEBEL, M., CHRISTEN, R., JONES, M.D.M., BREINER, H.-W., & RICHARDS, T.A. (2010)  
686 Multiple marker parallel tag environmental DNA sequencing reveals a highly complex  
687 eukaryotic community in marine anoxic water. *Molecular Ecology*, **19**, 21–31.
- 688 SUNAGAWA, S., COELHO, L.P., CHAFFRON, S., KULTIMA, J.R., LABADIE, K., SALAZAR, G., DJAHANSCHIRI, B., ZELLER,  
689 G., MENDE, D.R., ALBERTI, A., CORNEJO-CASTILLO, F.M., COSTEA, P.I., CRUAUD, C., D’OVIDIO, F., ENGELEN,  
690 S., FERRERA, I., GASOL, J.M., GUIDI, L., HILDEBRAND, F., KOKOSZKA, F., LEPOIVRE, C., LIMA-MENDEZ, G.,  
691 POULAIN, J., POULOS, B.T., ROYO-LLONCH, M., SARMENTO, H., VIEIRA-SILVA, S., DIMIER, C., PICHERAL, M.,  
692 SEARSON, S., KANDELS-LEWIS, S., BOWLER, C., DE VARGAS, C., GORSKY, G., GRIMSLEY, N., HINGAMP, P.,  
693 IUDICONE, D., JAILLON, O., NOT, F., OGATA, H., PESANT, S., SPEICH, S., STEMMANN, L., SULLIVAN, M.B.,  
694 WEISSENBACH, J., WINCKER, P., KARSENTI, E., RAES, J., ACINAS, S.G., & BORK, P. (2015) Structure and  
695 function of the global ocean microbiome. *Science*, **348**, 1261359.
- 696 TACKMANN, J., RODRIGUES, J.F.M., & VON MERING, C. (2019) Rapid Inference of Direct Interactions in  
697 Large-Scale Ecological Networks from Heterogeneous Microbial Sequencing Data. *Cell*  
698 *Systems*, **9**, 286-296.e8.
- 699 VELLEND, M. (2020) *The theory of ecological communities (MPB-57)*. Princeton University Press.
- 700 XU, Z., WANG, M., WU, W., LI, Y., LIU, Q., HAN, Y., JIANG, Y., SHAO, H., MCMINN, A., & LIU, H. (2018) Vertical  
701 Distribution of Microbial Eukaryotes From Surface to the Hadal Zone of the Mariana Trench.  
702 *Frontiers in Microbiology*, **9**, 2023.
- 703 YAVEROĞLU, Ö.N., MALOD-DOGNIN, N., DAVIS, D., LEVNAJIC, Z., JANJIC, V., KARAPANDZA, R., STOJMIROVIC, A., &  
704 PRŽULJ, N. (2014) Revealing the Hidden Language of Complex Networks. *Scientific Reports*, **4**,  
705 4547.
- 706

707 **FIGURES**

708

709 **Figure 1:** Sampling scheme. Location, number, and depth range of samples from the epipelagic zone  
710 including surface and DCM layer, the mesopelagic zone, and the bathypelagic zone from the global  
711 tropical and subtropical ocean and the Mediterranean Sea.

712

713 **Figure 2:** Spatial recurrence. A) Association prevalence showing the fraction of subnetworks in which  
714 an association appeared considering all depth layers across the global tropical and subtropical ocean  
715 and the Mediterranean Sea. Associations that occurred more often (black) appeared in the middle of  
716 the single static network visualization. Most edges had a low prevalence (blue) <20%. B) The sample-  
717 specific subnetworks of the four ocean layers (rows): surface (SRF), DCM, mesopelagic (MES), and  
718 bathypelagic (BAT), and the six regions (columns). The histograms show the association prevalence  
719 within each depth layer and region (excluding absent associations, i.e., 0% prevalence). The number  
720 of samples appears in the upper left corner, the number of edges with a prevalence >0% in the upper  
721 right corner, and the depth range in the lower right corner (in m below surface). Note that the  
722 prevalence goes up to 100% in B) vs. 66.5% in A).

723

724 **Figure 3:** Highly prevalent associations for each region and depth layer. If an association appears in  
725 more than 70% of subnetworks it is classified as highly prevalent. The four ocean layers (rows) are  
726 surface (SRF), DCM, mesopelagic (MES), and bathypelagic (BAT). The number of samples appears  
727 in the upper left corner, the number of edges in the upper right corner, and the depth range in the lower  
728 right corner (in m below surface).

729

730 **Figure 4:** Classification of associations. An association can be classified into global (>70%  
731 prevalence, not considering the MS), prevalent (>50%, not considering the MS), low-frequency  
732 (>20%, not considering the MS), regional, and other. Regional associations are assigned to one of six  
733 ocean basins. The number A) and fraction B) of each type of association are shown for each depth  
734 layer: surface (SRF) and DCM (epipelagic), mesopelagic (MES) and bathypelagic (BAT). Color  
735 indicates the type of classification. The associations have been classified into the five types based on  
736 their prevalence in each region. The prevalence of associations is shown in C). For instance, global  
737 associations have a prevalence above 70% in each region (not considering the MS). Regional  
738 associations are present in one region (indicated with yellow with mainly low prevalence >0%) and  
739 absent in all other regions (0% prevalence not shown in graph).

740

741 **Figure 5:** Microbial associations across depth layers. For each region and taxonomic domain, we color  
742 associations based on when they first appeared: surface (S, yellow), DCM (D, orange), mesopelagic  
743 (M, red), and bathypelagic (B, black). Absent ASVs are grouped in the white box. Columns show  
744 associations between archaea (Arc), bacteria (Bac), and eukaryotes (Euk).

745

746 **Figure 6:** Minimal Spanning Tree. Each subnetwork is a node in the MST and represents a sample.  
747 Nodes are colored according to A) the sample's depth layer, B) the samples ocean region, C) the  
748 subnetworks cluster, and D) selected environmental factors. In C), the barplots indicate the different  
749 layers within each cluster colored as in A).

750

751 **TABLES**

752

753

754

755

756

**Table 1:** Number of classified associations per depth layer. The sum of classified associations (including Other) is the number of present associations. Absent associations appear in other layers but in no subnetwork of a given layer. Global, prevalent, and low-frequency associations have been computed with and without considering the MS. The proportion of regional associations increased with depth (gray row).

| Depth layer           | Epipelagic (Surface) | Epipelagic (DCM) | Mesopelagic   | Bathypelagic   |
|-----------------------|----------------------|------------------|---------------|----------------|
| Global                | 26 (0.14%)           | 23 (0.31%)       | 21 (0.20%)    | -              |
| Prevalent             | 22 (0.12%)           | 47 (0.64%)       | 10 (0.10%)    | 7 (0.07%)      |
| Low-frequency         | 105 (0.58%)          | 160 (2.17%)      | 212 (2.05%)   | 51 (0.51%)     |
| Global (no MS)        | 86 (0.47%)           | 52 (0.70%)       | 28 (0.27%)    | 9 (0.09%)      |
| Prevalent (no MS)     | 207 (1.14%)          | 76 (1.03%)       | 27 (0.26%)    | 28 (0.28%)     |
| Low-frequency (no MS) | 1361 (7.46%)         | 219 (2.97%)      | 342 (3.30%)   | 489 (4.84%)    |
| Regional              | 2014 (11.05%)        | 2290 (31.03%)    | 3420 (33.00%) | 3669 (36.33%)  |
| MS                    | 596 (3.27%)          | 1295 (17.55%)    | 2254 (21.75%) | 1217 (12.05%)  |
| NAO                   | 577 (3.16%)          | 306 (4.15%)      | 422 (4.07%)   | 1522 (15.07%)  |
| SAO                   | 162 (0.89%)          | 304 (4.12%)      | 301 (2.90%)   | 143 (1.42%)    |
| SPO                   | 152 (0.83%)          | 105 (1.42%)      | 40 (0.39%)    | 109 (1.08%)    |
| NPO                   | 298 (1.63%)          | 133 (1.80%)      | 204 (1.97%)   | 516 (5.11%)    |
| IO                    | 229 (1.26%)          | 147 (1.99%)      | 199 (1.92%)   | 162 (1.60%)    |
| Other*                | 16067 (88.12%)       | 4860 (65.85%)    | 6701 (64.66%) | 6372 (63.10%)  |
| Other (no MS)*        | 14566 (79.88%)       | 4743 (64.27%)    | 6547 (62.17%) | 55904 (58.46%) |
| Present               | 18234 (100%)         | 7380 (100%)      | 10364 (100%)  | 10099 (100%)   |
| Absent                | 10884                | 21738            | 18754         | 19019          |

757

758

759

\*The number of unclassified (Other) associations is computed from present, regional, global, prevalent, and low-frequency associations. The last three classifications have been done with and without the MS, and subsequently the number of unclassified (other) associations varies.

760  
761

**Table 2:** Dataset compilation. Our data was a compilation of different datasets. We required that each location had to provide data for both eukaryotes and prokaryotes, which resulted in 397 samples. This condition allowed only 13 MalaDeep samples.

| Dataset                | Samples used for analysis | Stations | Depth range (m) | Water samples | Size Fraction ( $\mu\text{m}$ ) | 16S | 18S | Reference                                                          | ENA accession number                                     |
|------------------------|---------------------------|----------|-----------------|---------------|---------------------------------|-----|-----|--------------------------------------------------------------------|----------------------------------------------------------|
| <i>Malaspina</i>       |                           |          |                 |               |                                 |     |     |                                                                    |                                                          |
| <i>MalaSurf</i>        | 122                       | 120      | 3               | 122           | 0.2-3                           | 122 | 124 | (Ruiz-González <i>et al.</i> , 2019; Logares <i>et al.</i> , 2020) | PRJEB23913 [18S rRNA genes], PRJEB25224 [16S rRNA genes] |
| <i>MalaVP</i>          | 83                        | 13       | 3-4000          | 91            | 0.2-3                           | 91  | 83  | (Giner <i>et al.</i> , 2020) & This study                          | PRJEB23771 [18S rRNA genes], PRJEB45015 [16S rRNA genes] |
| <i>MalaDeep (Prok)</i> | 13                        | 30       | ~4000           | 60            | 0.2-0.8                         | 41  | -   | (Sanz-Sáez, 2021)                                                  | PRJEB45011                                               |
| <i>MalaDeep (Euk)</i>  | 13                        | 27       | 2400-4000       | 27            | 0.8-20                          | -   | 82  | This study                                                         | PRJEB45014                                               |
| Hotmix                 | 179                       | 29       | 3-4539          | 188           | 0.2-3                           | 188 | 179 | (Sebastián, Ortega-Retuerta, <i>et al.</i> , 2021)                 | PRJEB44683 [18S rRNA genes], PRJEB44474 [16S rRNA genes] |

16S and 18S refer to sequenced samples; Prok - prokaryotes; Euk - eukaryotes

762  
763

764 **SUPPLEMENTARY MATERIAL**

765 **SUPPLEMENTARY FIGURES**

766 **Supplementary Figure 1:** Robustness of the third condition for generating sample-specific  
767 subnetworks for each region and depth with sufficient samples (DCM layer from the SPO was removed  
768 because it contained only one sample). Within each region and depth, the set of samples was randomly  
769 subsampled containing between 10% to 90% of the original set using all samples. The y-axis shows  
770 the fraction of edges that were kept in the subsampled set compared to the original set. We considered  
771 A) only the number of kept edges and B) which edges were kept.

772

773 **Supplementary Figure 2:** Associations occurring in each region and depth layer. If an association  
774 appears in more than 20% of subnetworks in each region, it is classified as low-frequency, >50%  
775 prevalent, and >70% global. The number of samples appears in the upper left corner, the number of  
776 edges in the upper right corner, and the depth range in the lower right corner (in m below surface). We  
777 classified the associations considering all six regions (A-D) and considering the five ocean basins  
778 neglecting the MS (E-H).

779

780 **Supplementary Figure 3:** Regional associations occurring in each region and depth layer. Within a  
781 particular depth layer, if an association appears in at least one subnetwork (present) in one region and  
782 in no subnetwork (absent) in other regions, it is classified as regional. The four ocean layers (rows) are  
783 surface (SRF), DCM, mesopelagic (MES), and bathypelagic (BAT). The number of samples appears  
784 in the upper left corner, the number of edges in the upper right corner, and the depth range in the lower  
785 right corner (in m below surface).

786

787 **Supplementary Figure 4:** ASVs across depth layers. For each region, we color ASVs based on the  
788 layer they first appeared: surface (S, yellow), DCM (D, orange), mesopelagic (M, red), and  
789 bathypelagic (B, black). Absent ASVs are grouped in box “a”. An ASV only appearing in the  
790 bathypelagic, is assigned to box “a” in above layers. That is, an ASV detected in the surface and present  
791 in the DCM but absent in lower layers, appears in the box (S) in the surface and DCM layer, but in  
792 box “a” in the meso- and bathypelagic layer. An ASV cannot be assigned to two layers. Note that most  
793 ASVs in the bathypelagic zone have been already detected in upper layers because most ASVs are  
794 assigned to the boxes “S”, “D”, and “M” instead of “B”.

795

796 **Supplementary Figure 5:** Global network metrics grouped by region and depth layer.

797

798 **SUPPLEMENTARY TABLES**

799

800 **Supplementary Table 1:** Number of environmentally-driven edges detected by EnDED. We removed environmentally-driven edges  
 801 (indirect) from the preliminary network, which contained 31966 edges. Only edges that were not environmentally-driven by any  
 802 environmental factor (not indirect) remained in the network.

| Environmental factor | Number of samples | indirect            | Not indirect  |
|----------------------|-------------------|---------------------|---------------|
| Fluorescence         | 394               | 4 (0.01%)           | 31962         |
| NO3                  | 361               | 1563 (4.9%)         | 30403         |
| PO4                  | 359               | 1357 (4.2%)         | 30609         |
| Salinity             | 395               | 67 (0.2%)           | 31899         |
| SiO4                 | 360               | 632 (2.0%)          | 31334         |
| Temperature          | 395               | 622 (1.9%)          | 31344         |
| All                  |                   | 2848 (8.9%)         | 29118 (91.1%) |
|                      |                   | = 1779 removed by 1 |               |
|                      |                   | + 751 removed by 2  |               |
|                      |                   | + 308 removed by 3  |               |
|                      |                   | + 10 removed by 4   |               |

803

804

805 **Supplementary Table 2:** Fraction of microbial associations across depth layers. For each region and layer (rows), we determined the  
 806 constitution of associations (in percentage %) classifying them based on their first appearance (columns): surface, DCM, mesopelagic,  
 807 and bathypelagic. We indicated the fractions above 40% in grey.

| Region | Layer        | Surface | DCM   | Mesopelagic | Bathypelagic |
|--------|--------------|---------|-------|-------------|--------------|
| MS     | SRF          | 100.00  |       |             |              |
|        | DCM          | 45.14   | 54.86 |             |              |
|        | Mesopelagic  | 10.35   | 18.42 | 71.24       |              |
|        | Bathypelagic | 2.73    | 5.12  | 69.71       | 22.44        |
| NAO    | SRF          | 100.00  |       |             |              |
|        | DCM          | 68.30   | 31.70 |             |              |
|        | Mesopelagic  | 11.64   | 6.59  | 81.77       |              |
|        | Bathypelagic | 11.62   | 1.35  | 43.49       | 43.54        |
| SAO    | SRF          | 100.00  |       |             |              |
|        | DCM          | 45.08   | 54.92 |             |              |
|        | Mesopelagic  | 6.15    | 8.50  | 85.35       |              |
|        | Bathypelagic | 12.22   | 6.30  | 26.97       | 54.61        |
| SPO    | SRF          | 100.00  |       |             |              |
|        | DCM          | 50.07   | 49.93 |             |              |
|        | Mesopelagic  | 6.44    | 2.66  | 90.90       |              |
|        | Bathypelagic | 9.81    | 3.32  | 14.15       | 72.71        |
| NPO    | SRF          | 100.00  |       |             |              |
|        | DCM          | 54.23   | 45.77 |             |              |
|        | Mesopelagic  | 8.33    | 6.06  | 85.61       |              |
|        | Bathypelagic | 17.46   | 5.34  | 19.92       | 57.28        |
| IO     | SRF          | 100.00  |       |             |              |
|        | DCM          | 39.23   | 60.77 |             |              |
|        | Mesopelagic  | 5.92    | 7.87  | 86.21       |              |
|        | Bathypelagic | 11.00   | 3.84  | 29.61       | 55.56        |

808

**Supplementary Table 3** Subnetwork cluster. Clusters dominated, i.e. over 50%, by one layer or one region are indicated in grey. The last row shows unassigned subnetworks.

| cluster ID | Dominated by | Size | Fraction of depth layers |       |       |              |              | Number of regions (if no number if indicated, it is 1x) |                                        |                      |                         |                                  |
|------------|--------------|------|--------------------------|-------|-------|--------------|--------------|---------------------------------------------------------|----------------------------------------|----------------------|-------------------------|----------------------------------|
|            |              |      | Epipelagic               |       |       | Meso-pelagic | Bathypelagic | Epipelagic                                              |                                        |                      | Meso-MES                | Bathy-BAT                        |
|            |              |      | SRF                      | EPI   | DCM   |              |              | pelagic                                                 | EPI                                    | DCM                  |                         |                                  |
| 1          | MS           | 5    | 20.00                    | 20.00 | 20.00 | 20.00        | 20.00        | SAO                                                     | MS                                     | NAO                  | MS                      | MS                               |
| 2          | MS           | 10   | 10.00                    | -     | 20.00 | 20.00        | 50.00        | MS                                                      | -                                      | 2xMS                 | 2xMS                    | 5xMS                             |
| 3          | MS           | 8    | 12.50                    | -     | -     | 25.00        | 62.50        | SRF                                                     | -                                      | -                    | 2xMS                    | 5xMS                             |
| 4          | MS, MES      | 8    | -                        | 12.50 | -     | 75.00        | 12           | -                                                       | MS                                     | -                    | 6xMS                    | MS                               |
| 5          | MS, MES      | 12   | 16.67                    | -     | -     | 66.67        | 16.67        | IO, NAO                                                 | -                                      | -                    | 7xMS, NAO               | 2xNAO                            |
| 6          |              | 8    | 12.50                    | 25.00 | 12.50 | 25.00        | 25.00        | IO                                                      | MS, NAO                                | NPO                  | MS, NAO                 | 2xMS                             |
| 7          | BAT          | 15   | 13.33                    | -     | -     | 26.67        | 60.00        | IO, SPO                                                 | -                                      | -                    | IO, MS, SAO, SPO        | IO, MS, NAO, 2xNPO, 2xSAO, 2xSPO |
| 8          | DCM          | 10   | 10.00                    | -     | 90.00 | -            | -            | NPO                                                     | -                                      | 5xMS, NPO, 3xSAO     | -                       | -                                |
| 9          | DCM          | 11   | 36.36                    | -     | 63.64 | -            | -            | 2xNAO, NPO, SAO                                         | -                                      | 3xIO, 2xMS, NPO, SAO | -                       | -                                |
| 10         |              | 12   | -                        | -     | 8.33  | 50.00        | 41.67        | -                                                       | -                                      | NAO                  | IO, MS, NAO, 2xNPO, SAO | IO, 2xNAO, NPO, SAO              |
| 11         | MES          | 6    | -                        | -     | -     | 83.33        | 16.67        | -                                                       | -                                      | -                    | IO, MS, NPO, 2xSAO      | IO                               |
| 12         | NAO, MES     | 6    | 16.67                    | -     | -     | 83.33        | -            | NAO                                                     | -                                      | -                    | 2xMS, 3xNAO             | -                                |
| 13         | SRF          | 11   | 54.55                    | 9.09  | -     | 27.27        | 9.09         | IO, MS, NPO, 3xSAO                                      | MS                                     | -                    | 2xMS, NAO               | MS                               |
| 14         | BAT          | 16   | 12.50                    | 6.25  | 6.25  | 6.25         | 68.75        | MS, NAO                                                 | MS                                     | MS                   | MS                      | 5xNAO, 3xNPO, 2xSAO, SPO         |
| 15         | SRF          | 8    | 100.00                   | -     | -     | -            | -            | 3xIO, 4xNAO, NPO                                        | -                                      | -                    | -                       | -                                |
| 16         | MS, SRF      | 7    | 71.43                    | 14.29 | -     | 14.29        | -            | 4xMS, NPO                                               | MS                                     | -                    | MS                      | -                                |
| 17         | MS           | 9    | -                        | 11.11 | 33.33 | 22.22        | 33.33        | -                                                       | MS                                     | MS, NAO, SPO         | 2xMS                    | 3xMS                             |
| 18         | MS, BAT      | 8    | 12.50                    | 25.00 | -     | -            | 62.50        | IO                                                      | 2xMS                                   | -                    | -                       | 3xMS, 2xNAO                      |
| 19         | SRF          | 7    | 85.72                    | 14.29 | -     | -            | -            | 2xIO, NAO, NPO, 2xSAO                                   | MS                                     | -                    | -                       | -                                |
| 20         | SRF          | 15   | 73.33                    | -     | 6.67  | 6.67         | 13.33        | 2xIO, 2xNAO, NPO, 5xSAO, SPO                            | -                                      | MS                   | IO                      | IO, NPO                          |
| 21         |              | 8    | 25.00                    | -     | 12.50 | 25.00        | 37.50        | IO, SPO                                                 | -                                      | MS                   | MS, SAO                 | IO, 2xNAO                        |
| 22         |              | 17   | 23.53                    | -     | 5.88  | 35.29        | 35.29        | 3xSAO, SPO                                              | -                                      | MS                   | NAO, 2xNPO, SAO, 2xSPO  | IO, MS, NAO, 3xSAO               |
| 23         | SRF          | 8    | 75.00                    | 12.50 | -     | 12.50        | -            | IO, 2xMS, NAO, NPO, SPO                                 | MS                                     | -                    | MS                      | -                                |
| 24         | MS, MES      | 13   | 15.38                    | 7.69  | -     | 61.54        | 15.38        | 2xMS                                                    | MS                                     | -                    | IO, 4xMS, 3xNAO         | NAO, NPO                         |
| 25         |              | 14   | 28.57                    | 7.14  | 14.29 | 7.14         | 42.86        | 2xMS, 2xNAO                                             | MS                                     | 2xMS                 | NAO                     | MS, 3xNPO, 2xSAO                 |
| 26         | SRF          | 7    | 85.72                    | 14.29 | -     | -            | -            | 2xIO-SRF, MS-EPI, 2xNAO-SRF, 2xNPO-SRF                  | 2xIO-SRF, MS-EPI, 2xNAO-SRF, 2xNPO-SRF | -                    | -                       | -                                |
| 27         | SRF          | 11   | 100.00                   | -     | -     | -            | -            | 2xIO, NAO, 4xNP, 4xSPO                                  | -                                      | -                    | -                       | -                                |
| 28         | MS           | 11   | 9.09                     | 27.27 | -     | 36.36        | 27.27        | MS                                                      | 3xNAO                                  | -                    | 4xMS                    | 3xMS                             |
| 29         |              | 12   | 50.00                    | -     | 16.67 | 16.67        | 16.67        | IO, MS, 3xNAO, SAO                                      | -                                      | MS, NAO              | 2xMS                    | 2xMS                             |
| 30         |              | 6    | 50.00                    | -     | 16.67 | 16.67        | 16.67        | IO, NAO, SPO                                            | -                                      | MS                   | NPO                     | IO-BAT                           |
| 31         | MS           | 28   | 25.00                    | 10.71 | 7.14  | 35.71        | 21.43        | 4xIO, 2xMS, SAO                                         | 3xMS                                   | 2xMS                 | 6xMS, 2xNAO, 2xNPO      | IO, 2xMS, 3xNAO                  |
| 32         | SRF          | 6    | 100.00                   | -     | -     | -            | -            | IO, 2xNA, NPO, 2xSAO                                    | -                                      | -                    | -                       | -                                |
| 33         | SRF          | 6    | 100.00                   | -     | -     | -            | -            | NAO, 3xNPO, SAO, SPO                                    | -                                      | -                    | -                       | -                                |
| 34         | SRF          | 14   | 100.00                   | -     | -     | -            | -            | IO, 4xNAO, 5xNPO, 2xSAO, 2xSPO                          | -                                      | -                    | -                       | -                                |
| 35         | SRF          | 13   | 69.23                    | 7.69  | -     | -            | 23.08        | 4xIO, 3xNAO, SAO, SPO                                   | MS                                     | -                    | -                       | 3xMS                             |
| 36         | SRF          | 7    | 100.00                   | -     | -     | -            | -            | 3xIO, 3xNPO, SAO                                        | -                                      | -                    | -                       | -                                |
| -          |              | 24   | 41.67                    | -     | 12.50 | 29.17        | 16.67        | 2xIO, MS, 2xNAO, 3xNPO, 2xSAO                           | -                                      | MS, 2xNAO            | 2xIO, 4xMS, NPO         | MS, NAO, NPO, SAO                |

MS – Mediterranean Sea, NAO – North Atlantic Ocean, SAO – South Atlantic Ocean, SPO – South Pacific Ocean, NPO – North Pacific Ocean, IO – Indian Ocean, EPI – epipelagic layer, SRF – surface, DCM – Deep Chlorophyll Maximum, MES – mesopelagic layer, BAT – bathypelagic layer



812  
813  
814

**Supplementary Table 4** Number of edges within each region and depth layer before ( $J>0\%$ ) and after filtering edges with low Jaccard index measuring how often the association partners appeared together in the region and depth layer. The DCM layer in the South Pacific Ocean (SPO) contained only one subnetwork, which resulted in the edge prevalence being 100% for all edges.

| Region | Layer     | Samples | Depth (m) | $J>0\%$ | $J>10\%$ | $J>20\%$ | $J>30\%$ | $J>40\%$ | $J>50\%$ |
|--------|-----------|---------|-----------|---------|----------|----------|----------|----------|----------|
| MS     | EPI - SRF | 19      | 3         | 3710    | 3631     | 3263     | 2881     | 2375     | 1797     |
|        | EPI       | 18      | 12-50     | 4763    | 4682     | 4196     | 3731     | 3064     | 2189     |
|        | EPI - DCM | 21      | 40-130    | 5545    | 5417     | 4736     | 4030     | 3062     | 2027     |
|        | MES       | 52      | 200-1000  | 8756    | 8403     | 7336     | 6179     | 4629     | 3088     |
|        | BAT       | 35      | 1100-3300 | 4497    | 4263     | 3694     | 3171     | 2506     | 1830     |
| NAO    | EPI - SRF | 34      | 3         | 15862   | 15255    | 13478    | 11449    | 8487     | 5331     |
|        | EPI       | 4       | 50        | 3027    | 3027     | 3027     | 2778     | 2529     | 2091     |
|        | EPI - DCM | 6       | 70-106    | 3865    | 3865     | 3738     | 3480     | 2973     | 2212     |
|        | MES       | 14      | 200-800   | 6325    | 6289     | 5689     | 5109     | 4169     | 2978     |
|        | BAT       | 20      | 1200-4539 | 7490    | 7419     | 6831     | 6206     | 5211     | 3857     |
| SAO    | EPI - SRF | 26      | 3         | 13118   | 12768    | 11026    | 9269     | 6842     | 4353     |
|        | EPI - DCM | 4       | 80-130    | 4199    | 4199     | 4199     | 3941     | 3443     | 2468     |
|        | MES       | 6       | 450-850   | 3937    | 3937     | 3740     | 3440     | 2687     | 1614     |
|        | BAT       | 11      | 1290-4000 | 4143    | 4130     | 3886     | 3605     | 3049     | 2254     |
| NPO    | EPI - SRF | 29      | 3         | 14376   | 13778    | 11919    | 9907     | 7323     | 4736     |
|        | EPI - DCM | 3       | 37-110    | 3100    | 3100     | 3100     | 3100     | 2568     | 1968     |
|        | MES       | 9       | 200-780   | 4197    | 4197     | 3781     | 3343     | 2583     | 1625     |
|        | BAT       | 12      | 2000-4000 | 5198    | 5185     | 4834     | 4510     | 4009     | 3372     |
| SPO    | EPI - SRF | 14      | 3-5       | 12007   | 11927    | 10420    | 8990     | 6728     | 4480     |
|        | EPI - DCM | 1       | 65        | 1530    | 1530     | 1530     | 1530     | 1530     | 1530     |
|        | MES       | 3       | 450-650   | 2066    | 2066     | 2066     | 2066     | 1756     | 1318     |
|        | BAT       | 3       | 1500-4000 | 3159    | 3159     | 3159     | 3159     | 2906     | 2128     |
| IO     | EPI - SRF | 35      | 3         | 14307   | 13646    | 11736    | 9602     | 6912     | 4396     |
|        | EPI - DCM | 3       | 86-130    | 3411    | 3411     | 3411     | 3411     | 2855     | 2310     |
|        | MES       | 7       | 400-950   | 4654    | 4654     | 4344     | 3961     | 3083     | 2082     |
|        | BAT       | 8       | 1065-4000 | 2928    | 2928     | 2790     | 2563     | 2101     | 1290     |

815  
816  
817  
818

MS – Mediterranean Sea, NAO – North Atlantic Ocean, SAO – South Atlantic Ocean, SPO – South Pacific Ocean, NPO – North Pacific Ocean, IO – Indian Ocean, EPI – epipelagic layer, SRF – surface, DCM – Deep Chlorophyll Maximum, MES – mesopelagic layer, BAT – bathypelagic layer

819 **SUPPLEMENTARY MATERIAL**

820

821 **Supplementary Material 1:** Highly prevalent (>70%) regional associations. For each association  
822 between two ASVs (first and second column) we list: region (third column), depth layer (fourth  
823 column), prevalence in that region and depth layer (fifth column), type: eukaryotic (Euk\_Euk),  
824 prokaryotic (Prok\_Prok), and association between domains (Euk\_Prok) (sixth column), and the phyla  
825 (seventh and eight column).

826

827 **Supplementary Material 2:** Associations appearing in all layers in at least one region. For each  
828 association between two ASVs (first and second column) we list: the classification in each layer (3-6  
829 column), overall prevalence (8. column), prevalence in each region and depth layer (9- 34. column),  
830 the number of regions in which the association appeared in all layers (AllLayers, 35. column), the  
831 number of layers an association appears in a region (36-41. column), type: eukaryotic (Euk\_Euk),  
832 prokaryotic (Prok\_Prok), and association between domains (Euk\_Prok) (42. column), and the phyla  
833 (43-44. column).

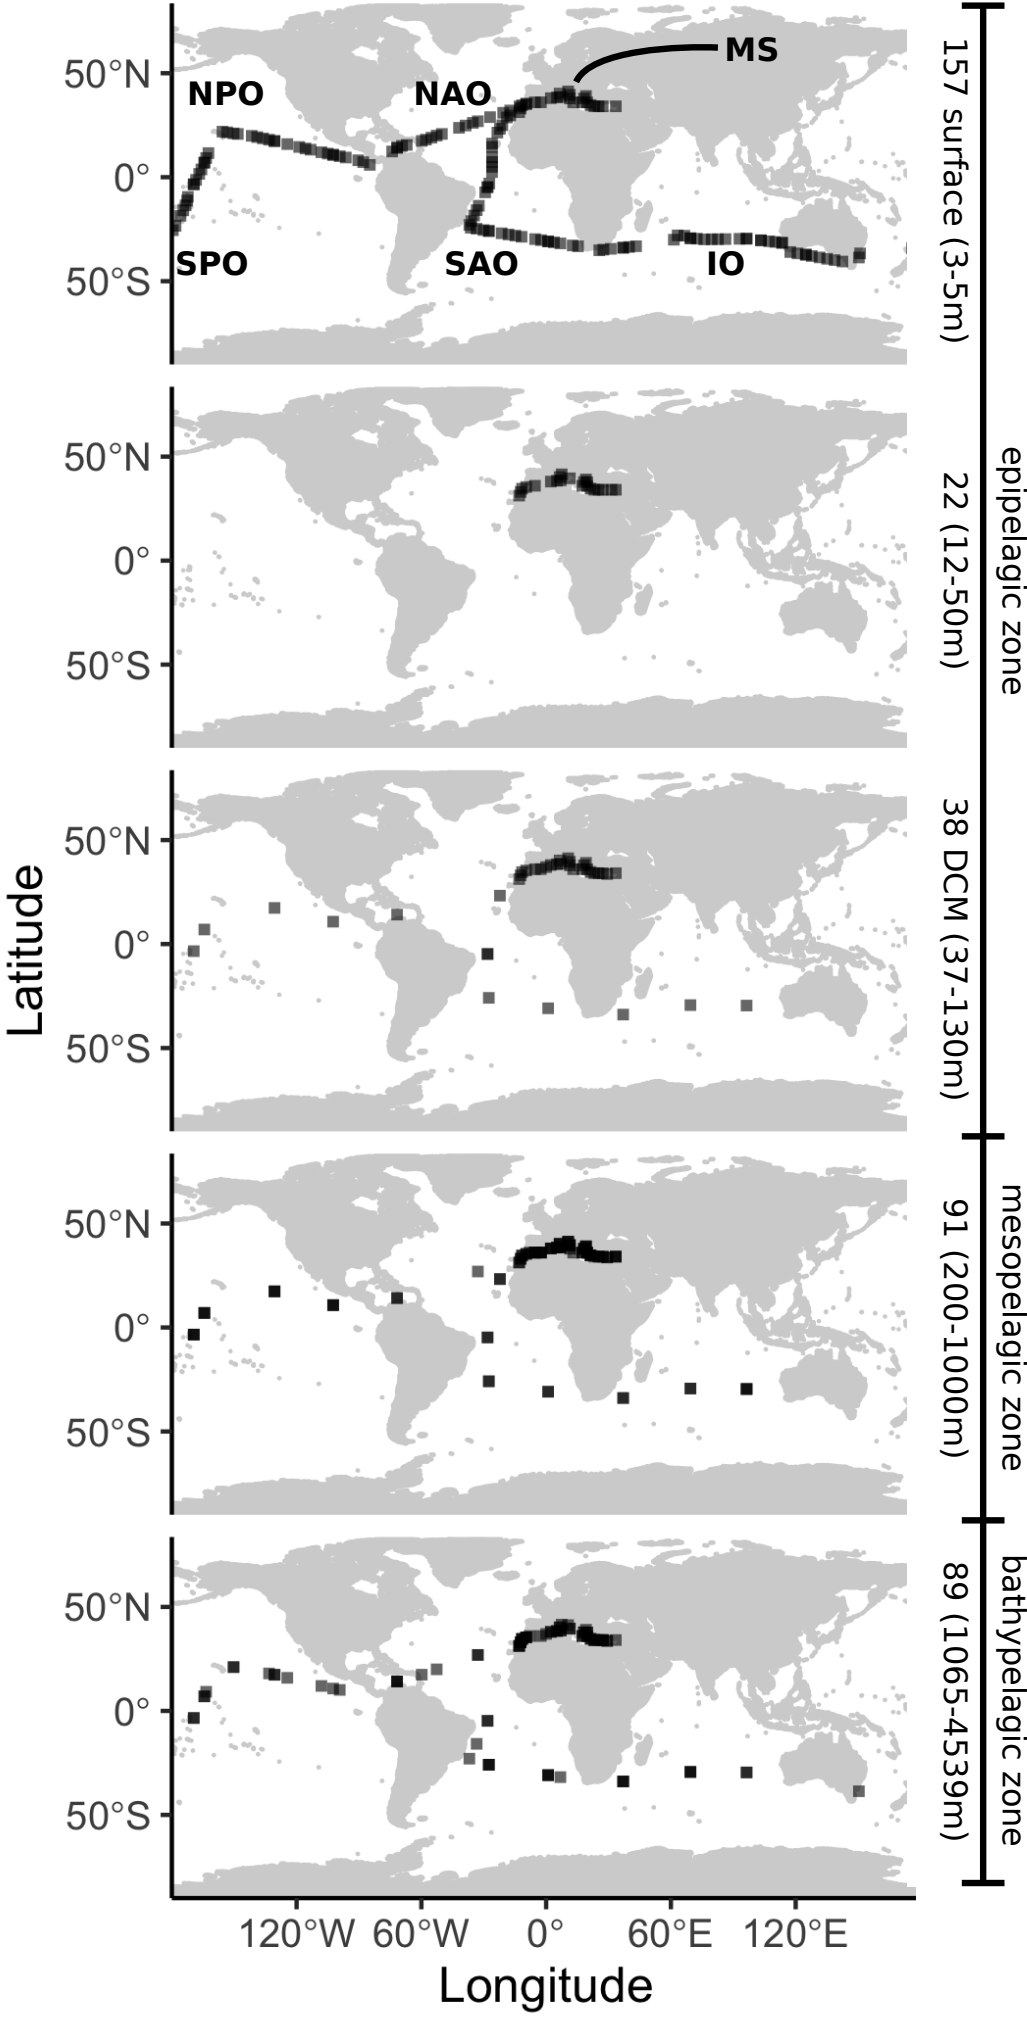

MS - Mediterranean Sea

IO - Indian Ocean

NAO - North Atlantic Ocean

NPO - North Pacific Ocean

SAO - South Atlantic Ocean

SPO - South Pacific Ocean

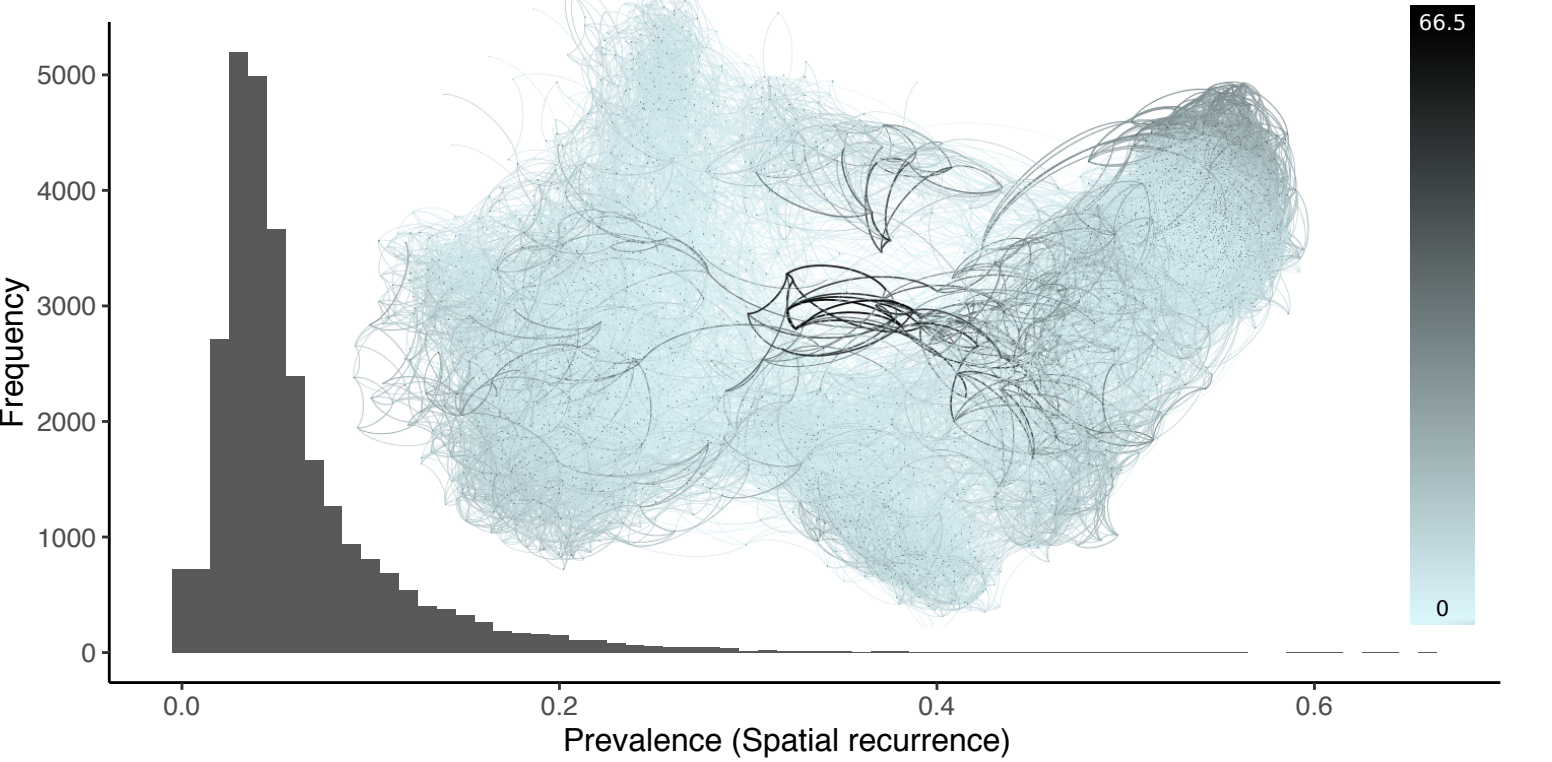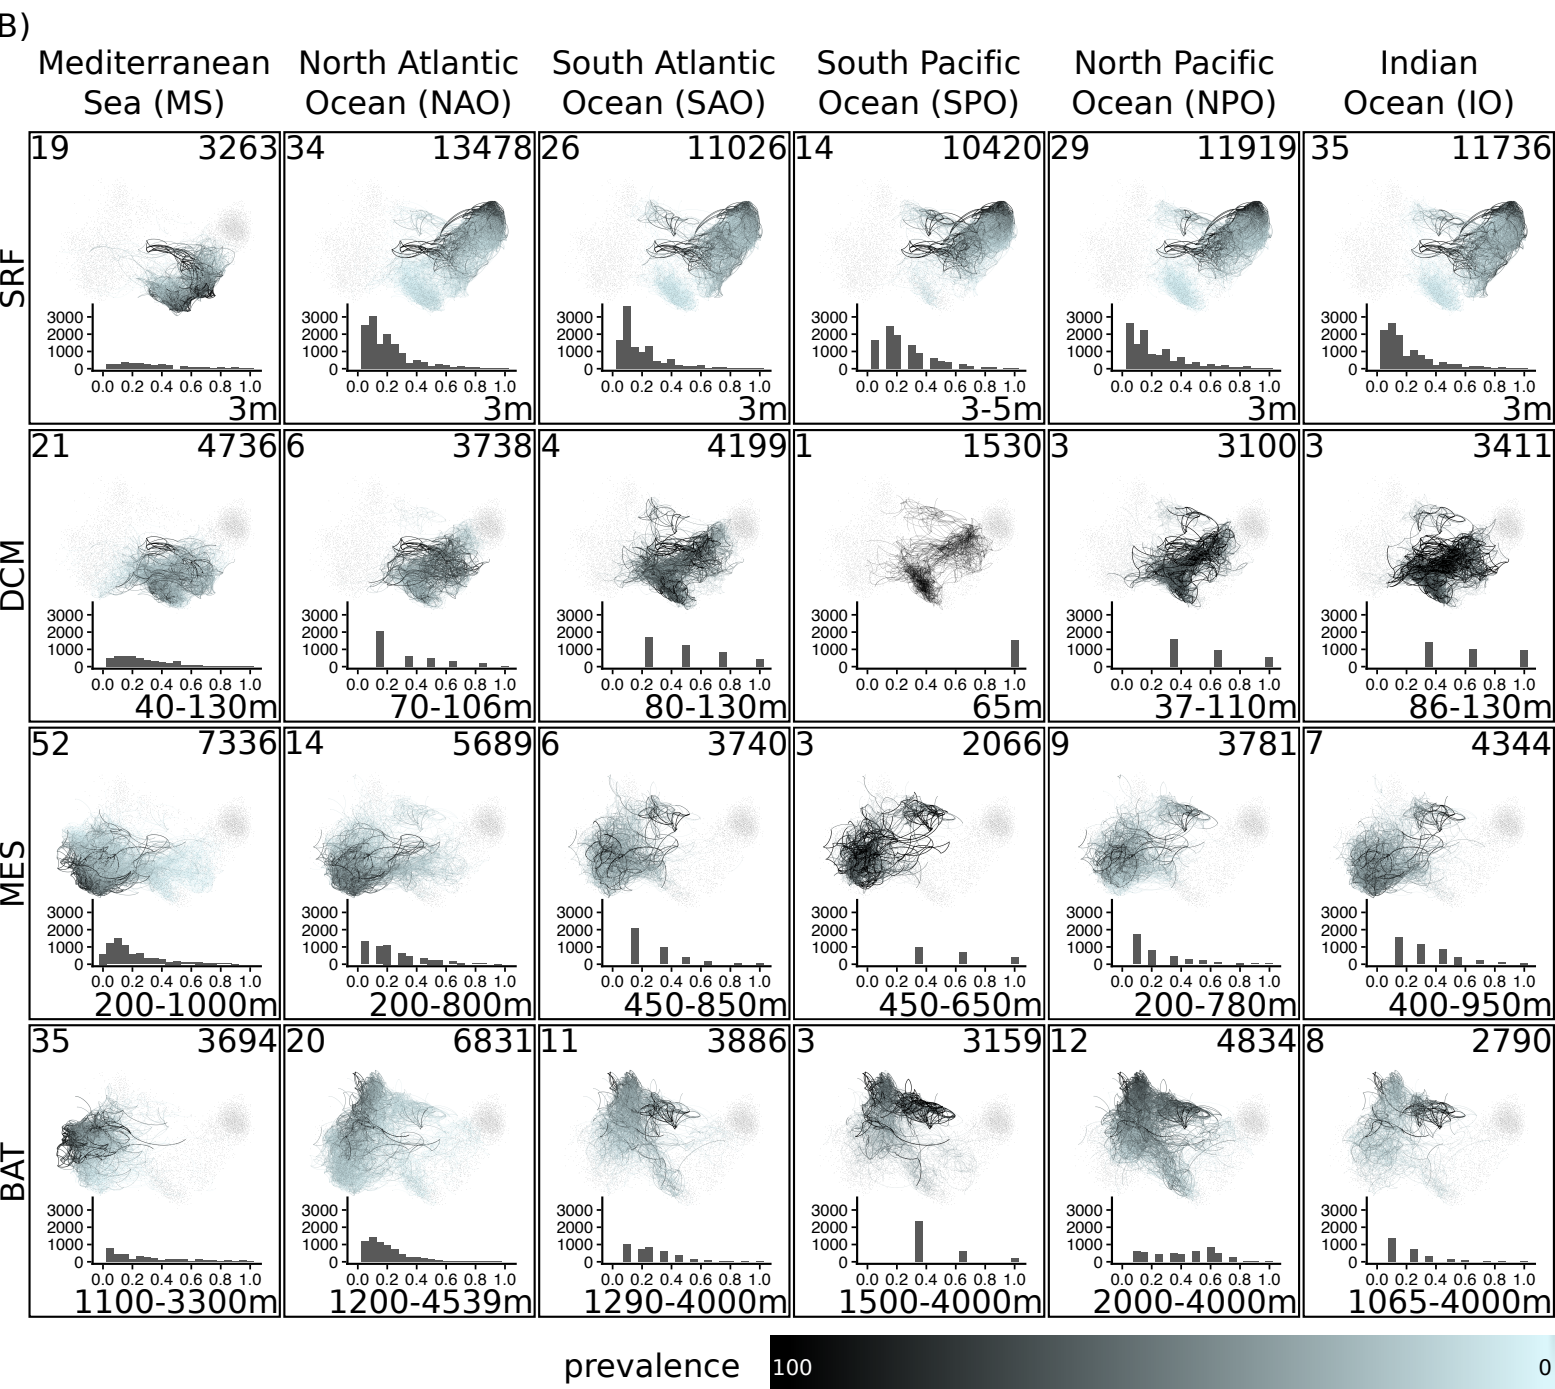

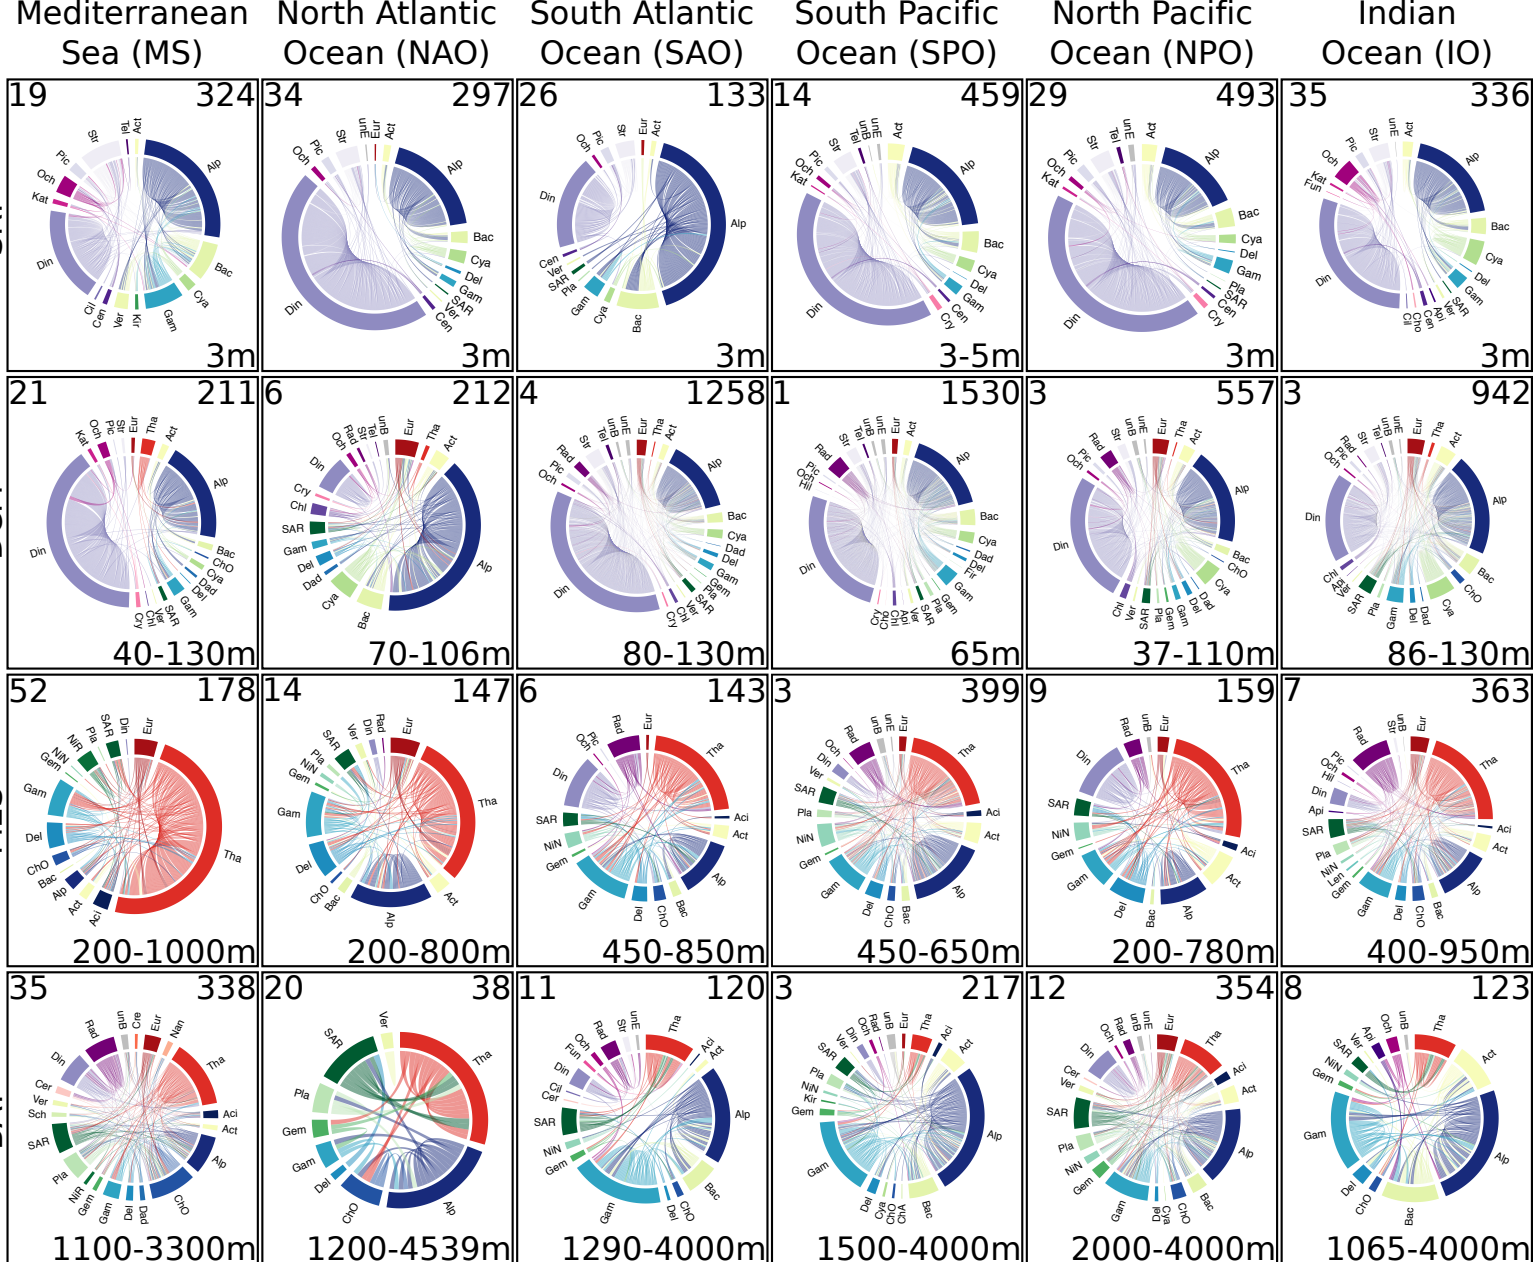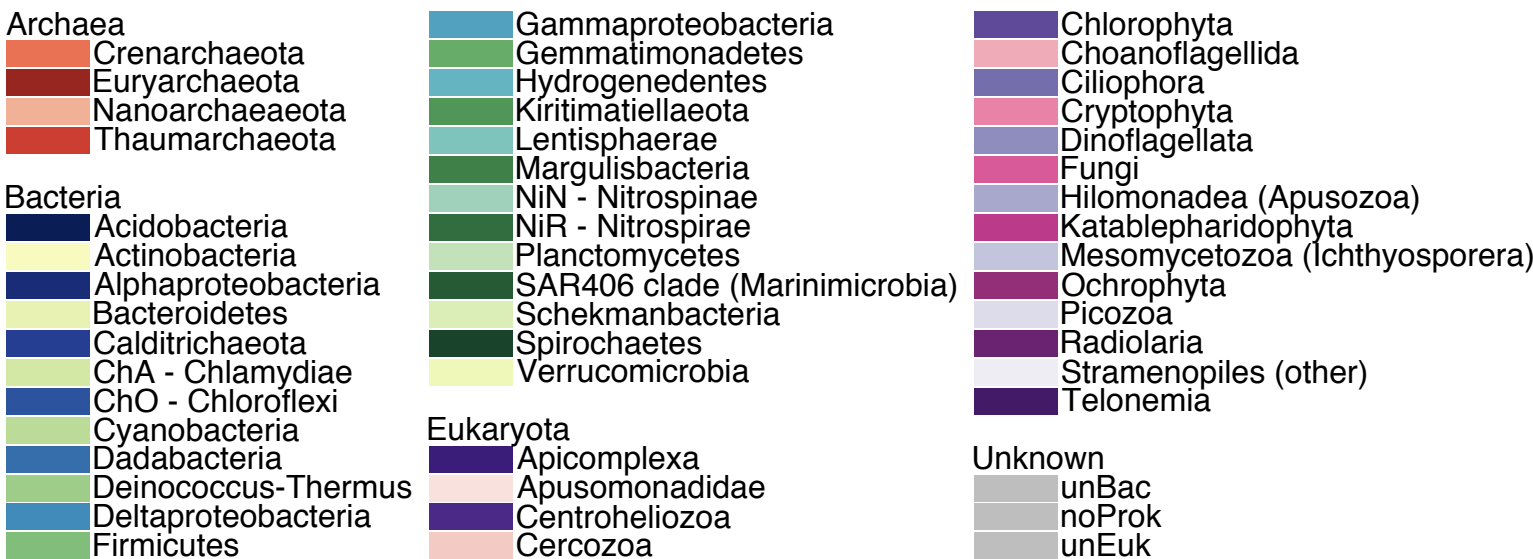

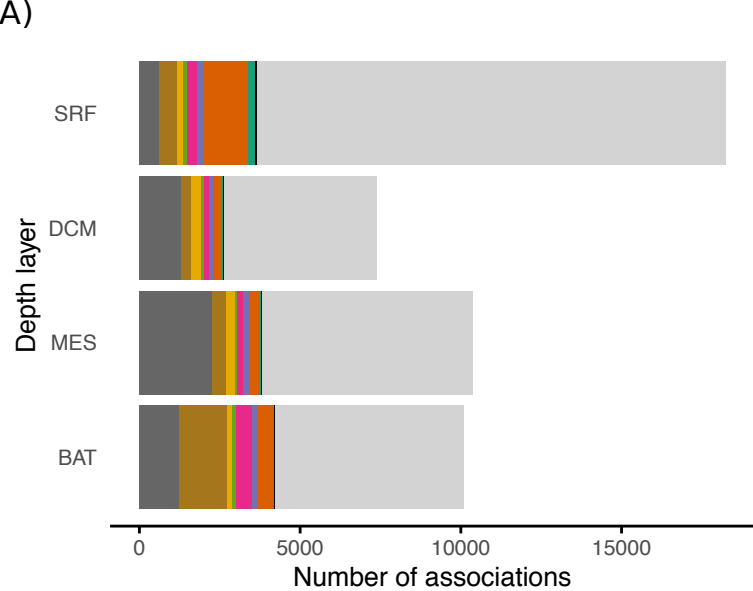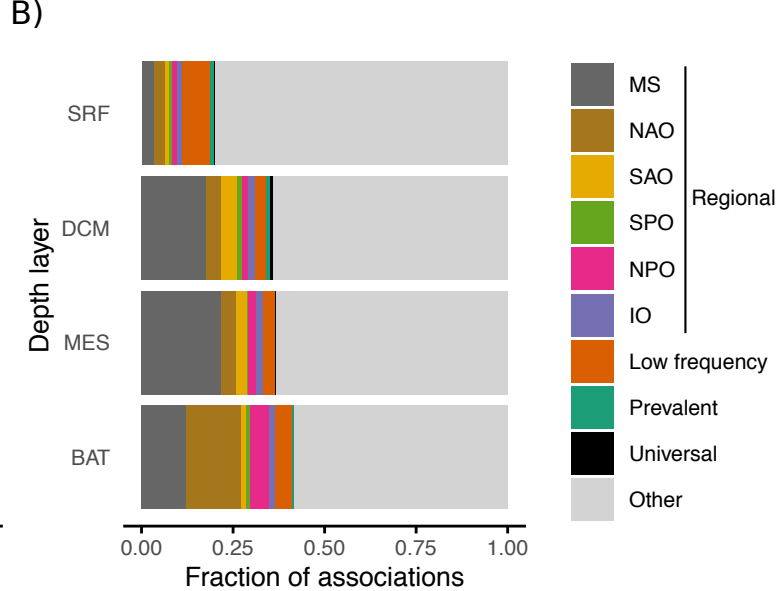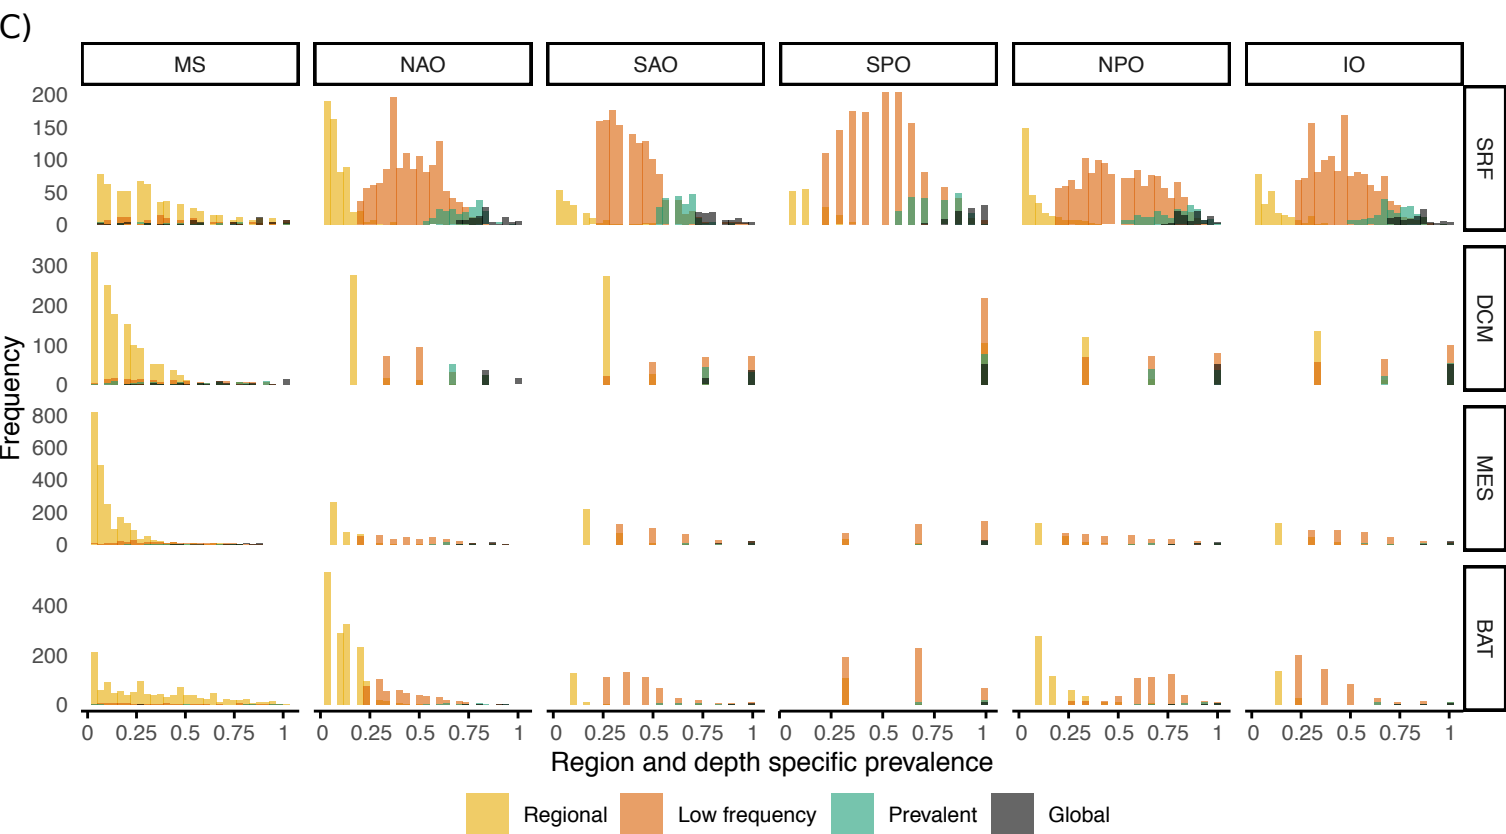

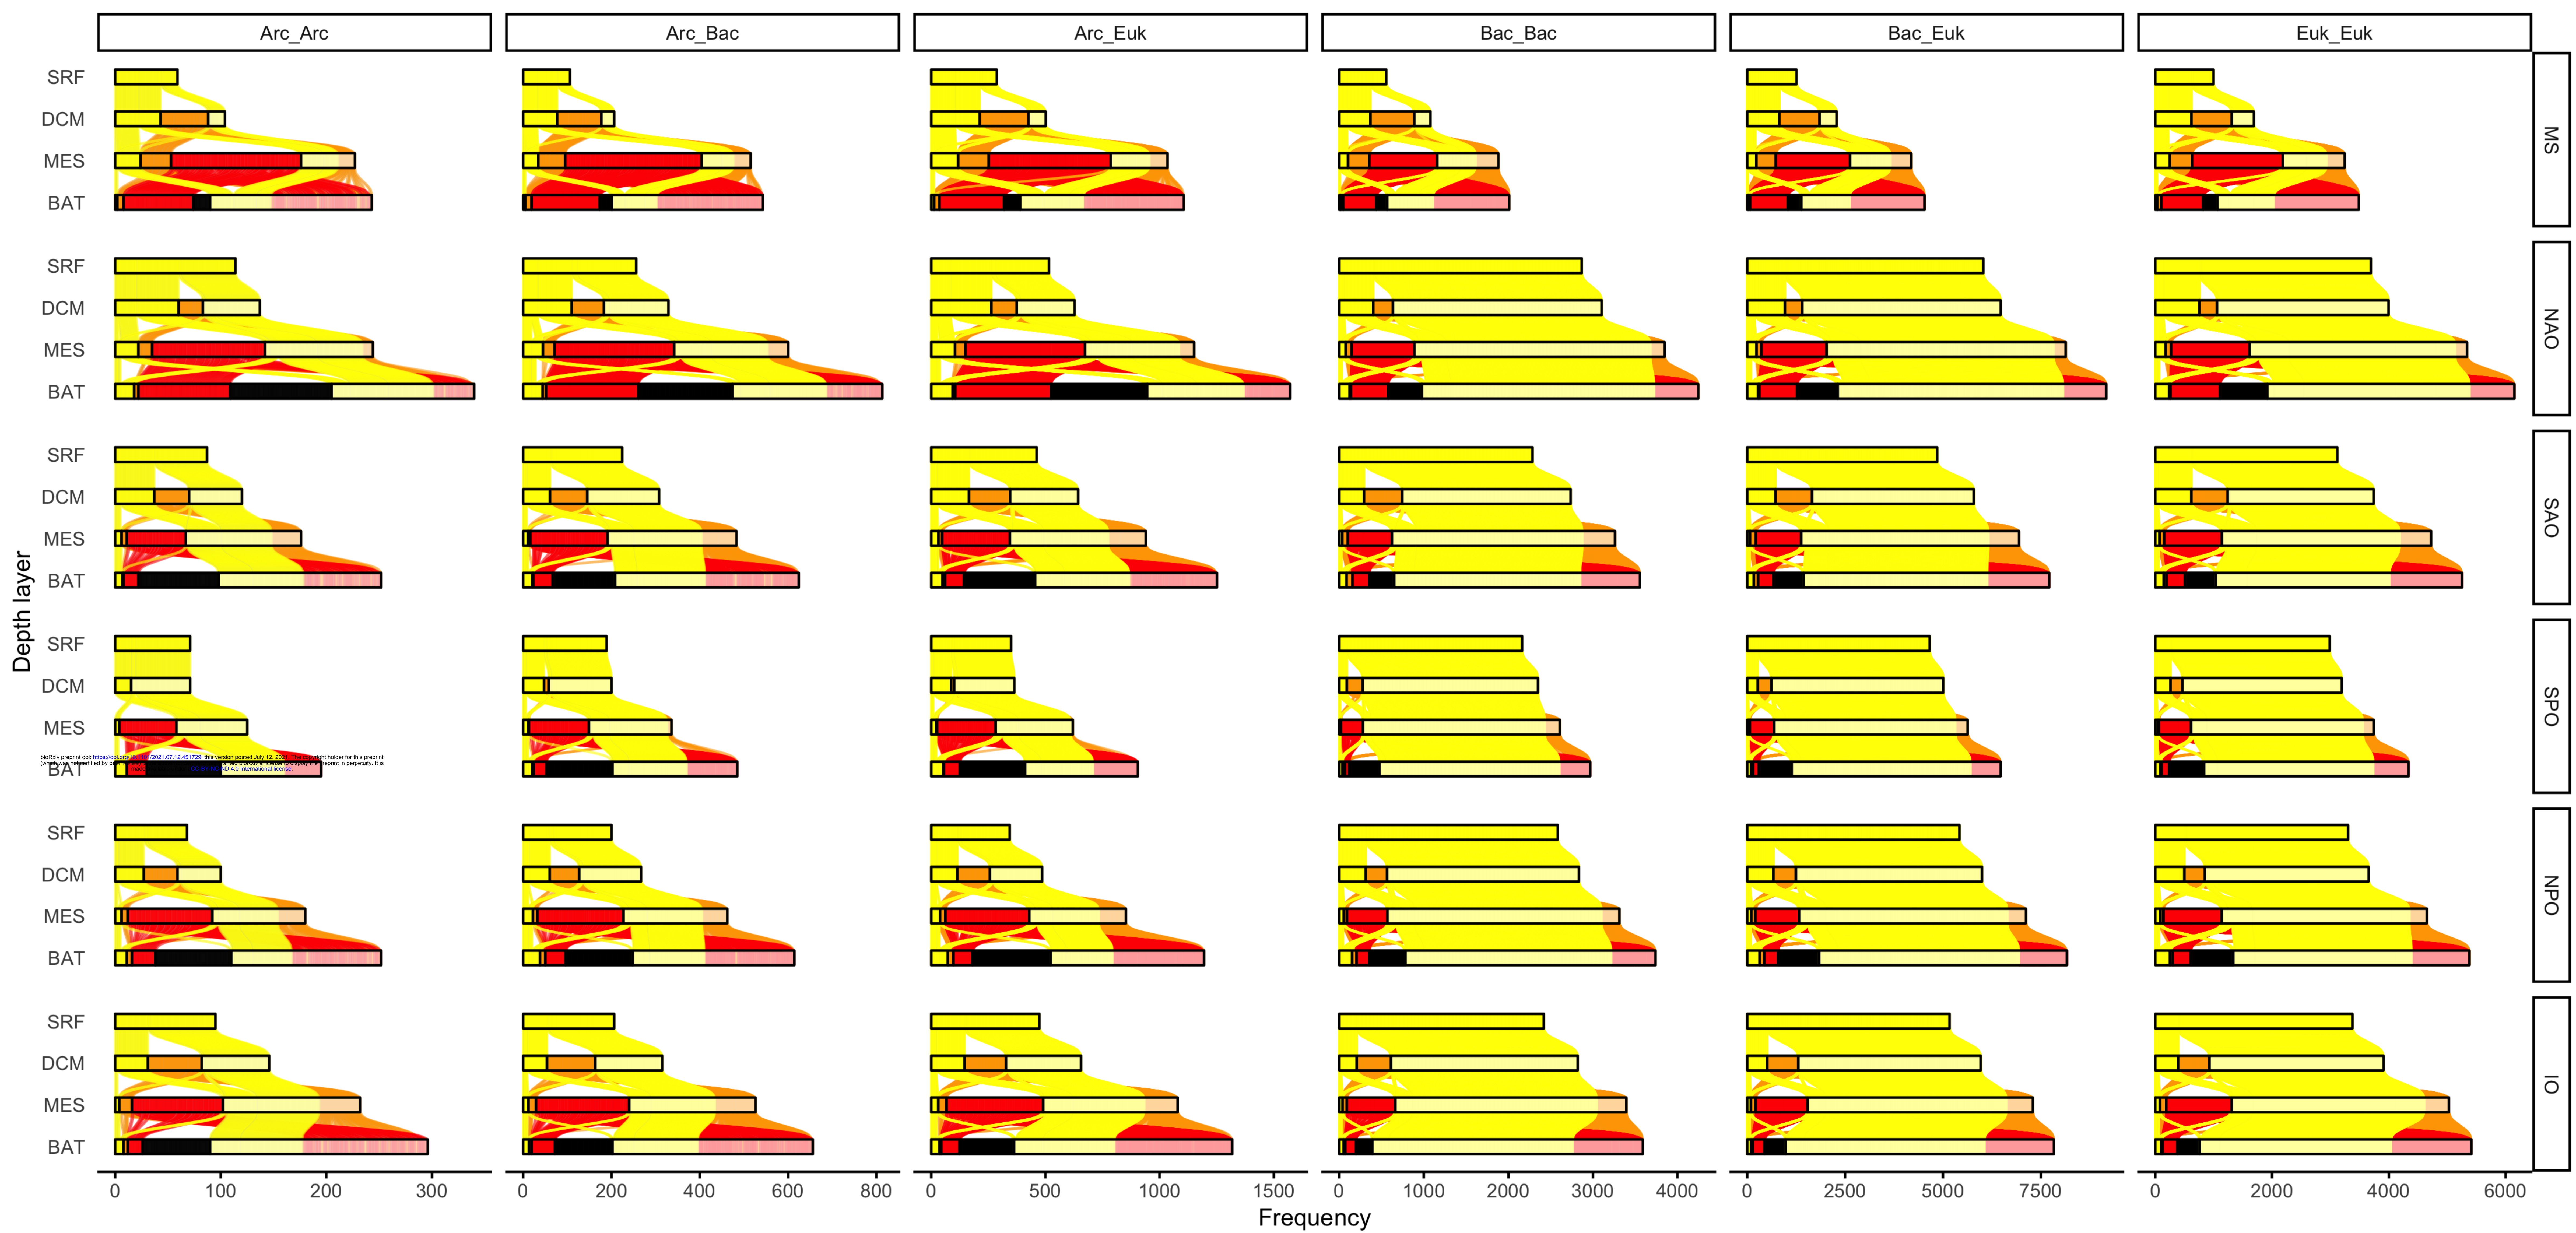

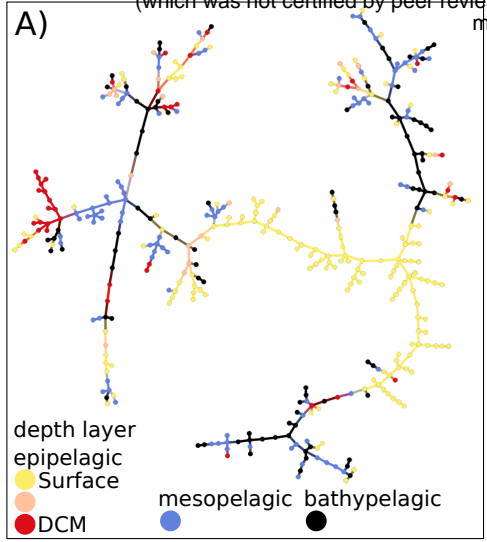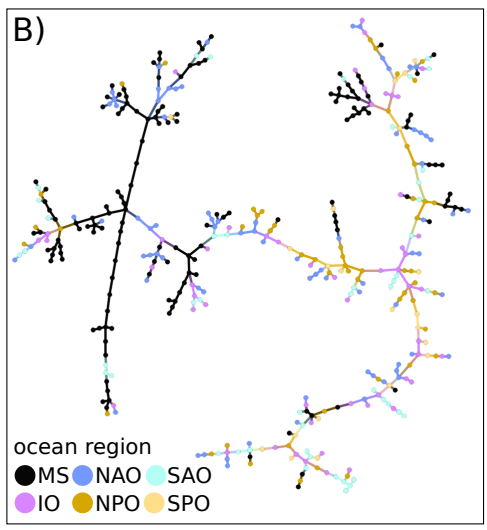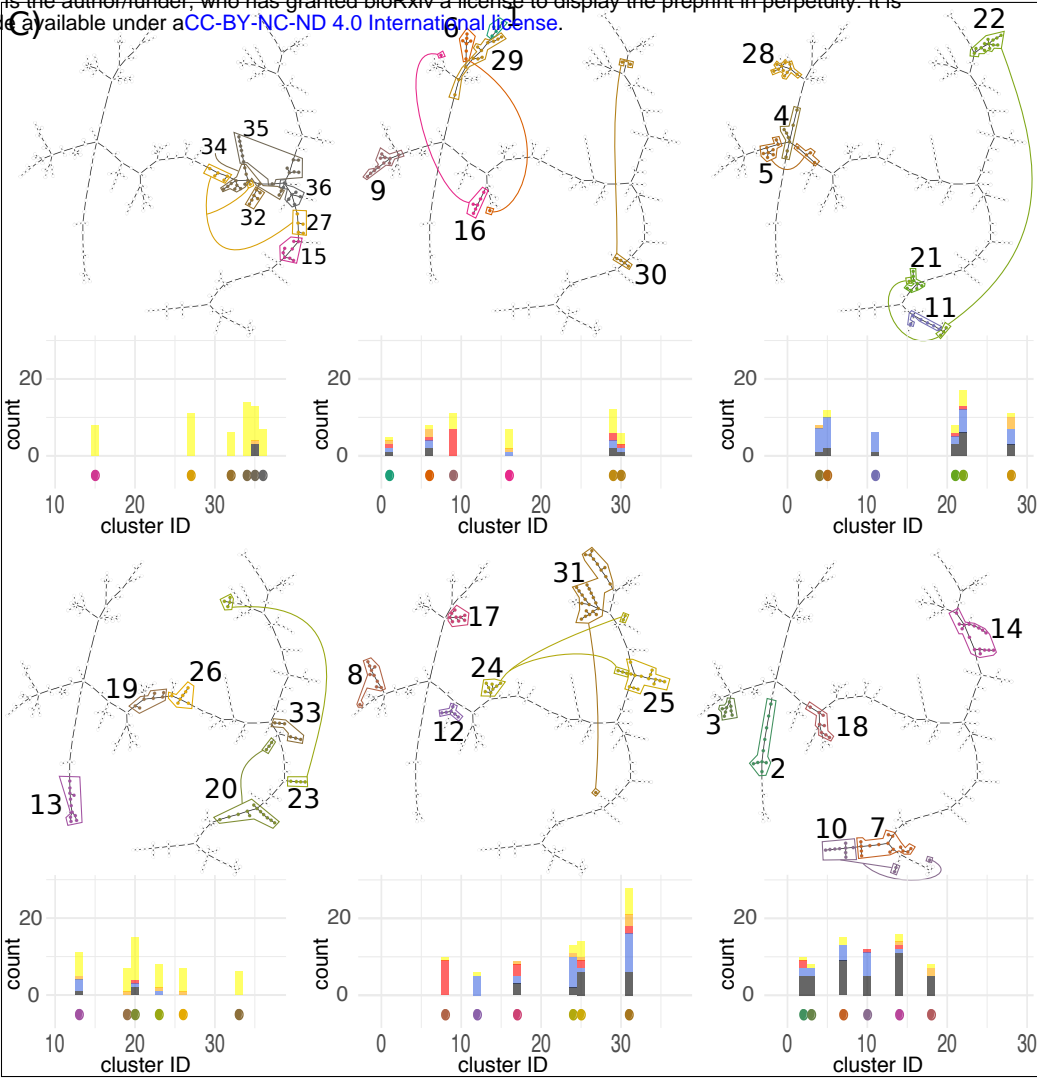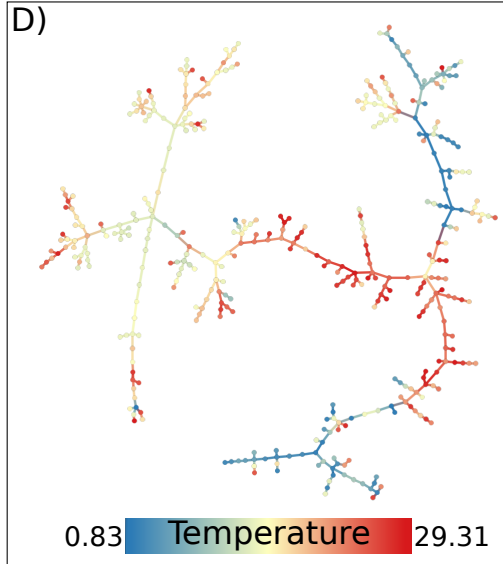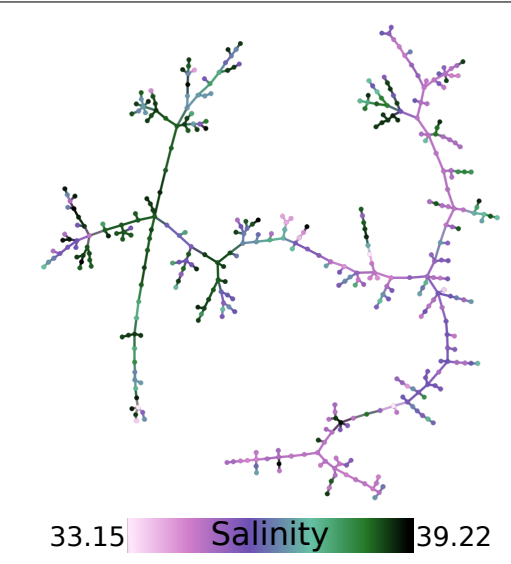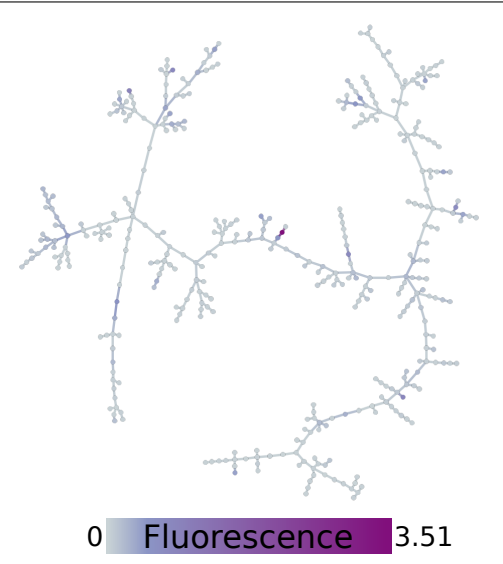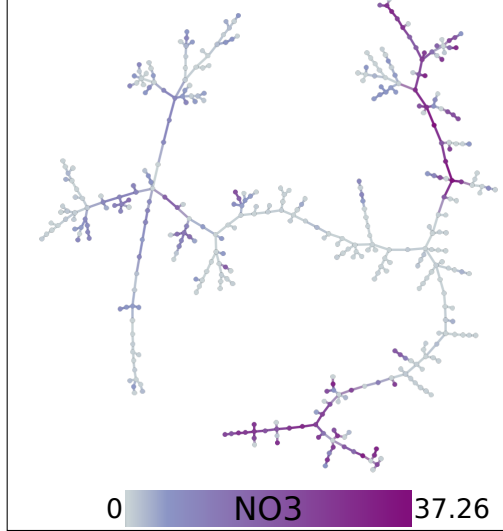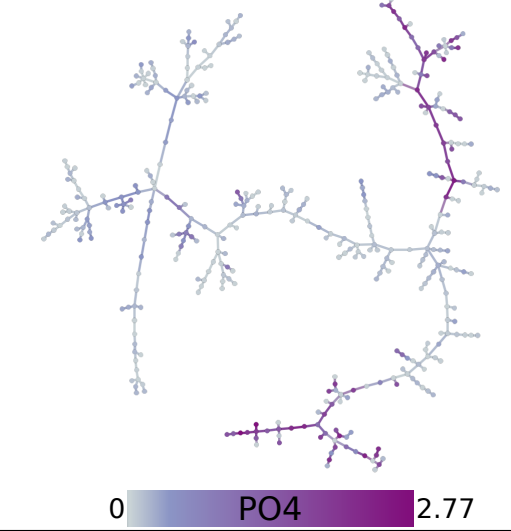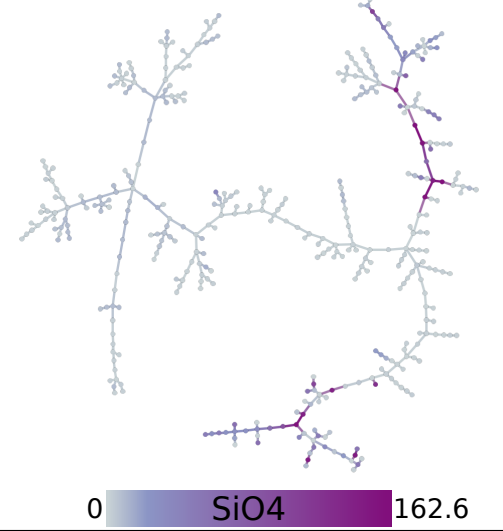

Source: https://www.biorxiv.org/content/10.1101/2021.07.12.451729v1.full.pdf
